# Supplementary material for: Human Adipose‐Derived Stem Cells Expanded Under Ambient Oxygen Concentration Accumulate Oxidative DNA Lesions and Experience Procarcinogenic DNA Replication Stress
Source: PubMed Central journal article supplement (PMC5442744; doi:10.5966/sctm.2015-0401), 2016-08-02
Supplement: SCT3-6-068-s001.pdf [file SCT3-6-068-s001.pdf]

## Supplementary Figure 1

**A**

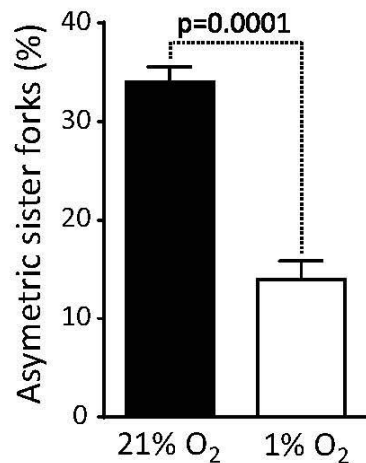

**B**

|         | [O <sub>2</sub> ] | Median track length (kb) | Fork velocity (kb/min) | n   | p-value |
|---------|-------------------|--------------------------|------------------------|-----|---------|
| Donor-1 | 21%               | 39.05 +/- 1.23           | 1.953                  | 100 | -       |
|         | 1%                | 34.29 +/- 0.94           | 1.715                  | 113 | 0.0098  |
| Donor-2 | 21%               | 43.02 +/- 1.21           | 2.151                  | 125 | -       |
|         | 1%                | 35.60 +/- 1.11           | 1.780                  | 113 | <0.0001 |
| Donor-3 | 21%               | 39.30 +/- 1.10           | 1.965                  | 115 | -       |
|         | 1%                | 31.42 +/- 0.76           | 1.571                  | 129 | <0.0001 |

**Fig. S1.** Culture of ADSC under 21% oxygen increase both DNA replication fork stalling and speed. **(A)** Proportion of asymmetric sister forks. Error bars represent standard deviation from three independent donors and significance was determined by t-test. **(B)** Replication fork speed in ADSC from three donors cultured under 1% or 21% oxygen. N tracks of IdU and CldU were scored in each condition. The median value of the population is given in kb +/- standard errors and converted in kb/min. Mann-Whitney test was applied to compare data sets, p-value is indicated.

## Supplementary Figure 2

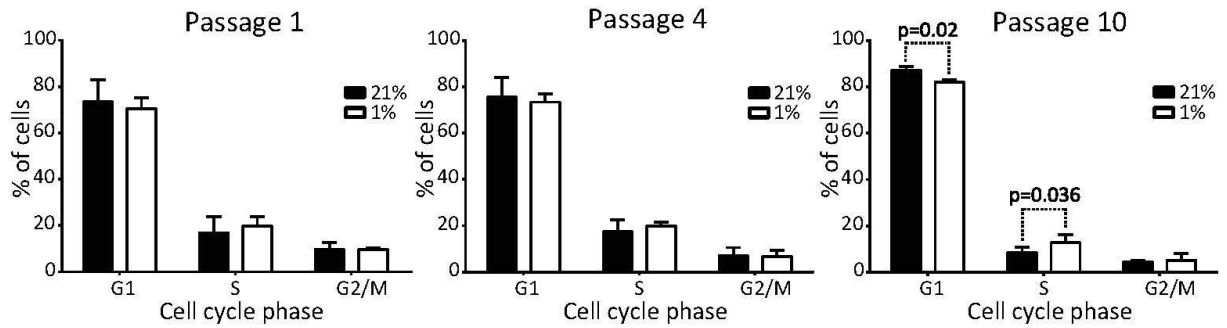

**Fig. S2.** ADSC grown in Normoxia or hypoxia have similar cell cycle repartition at passage 1 and 4 but not passage 10. Cell cycle repartition of ADSC of three independent donors at passage 1, 4 and 10. Error bars represent standard deviation from the three independent donors and significance was determined by t-test.

# Supplementary Figure 3

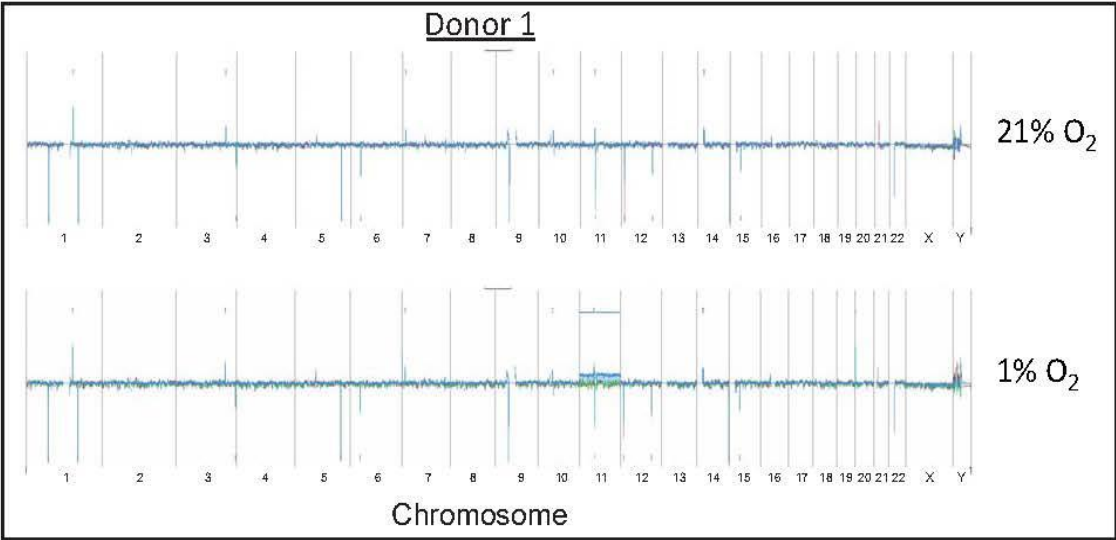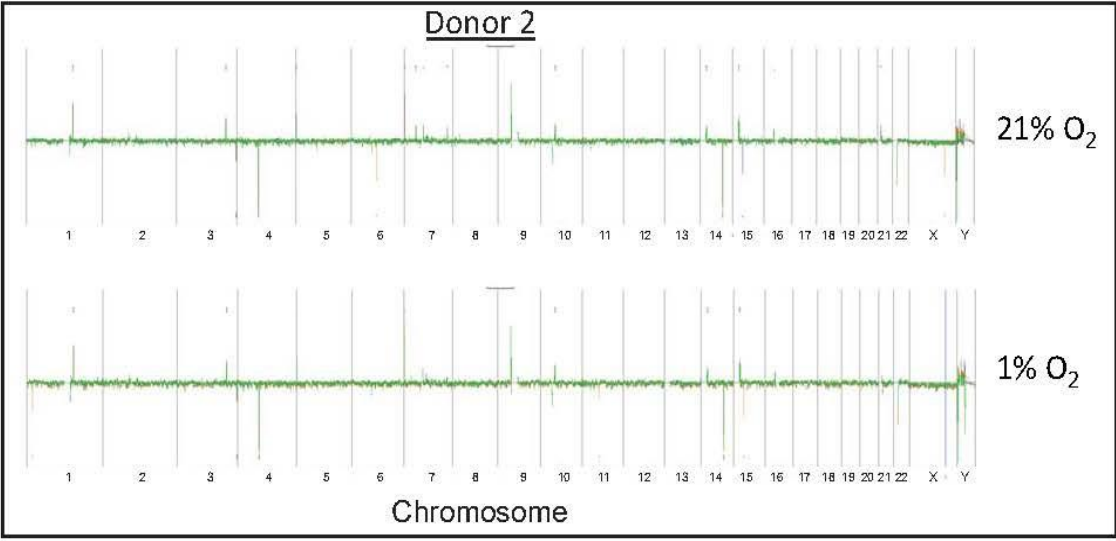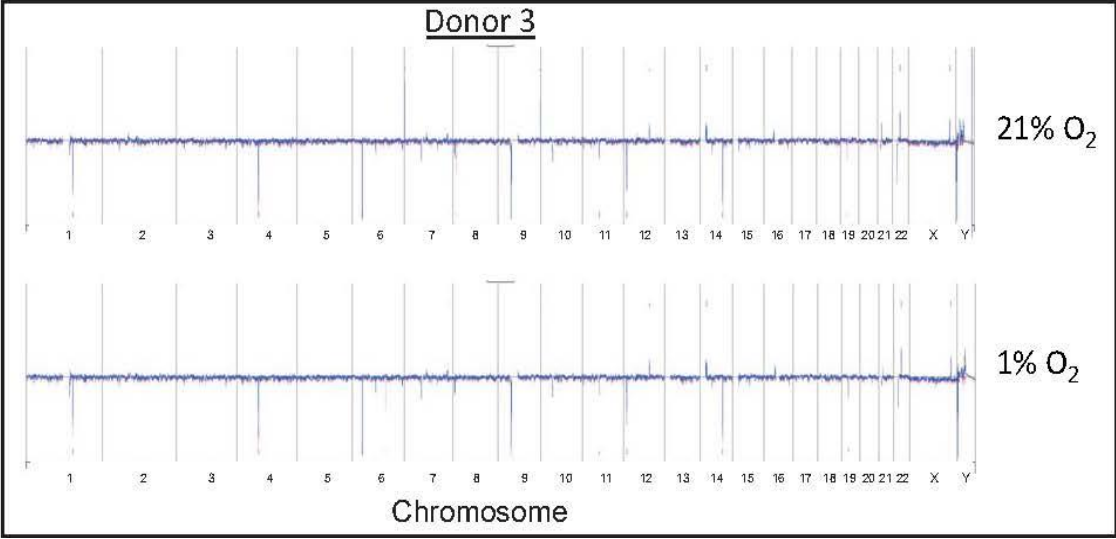

# Supplementary Figure 3

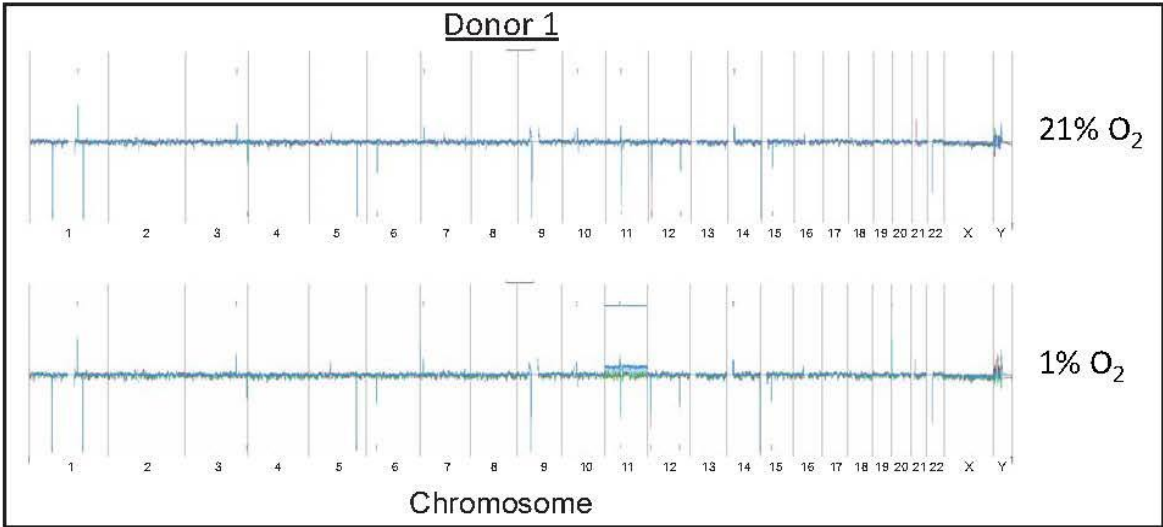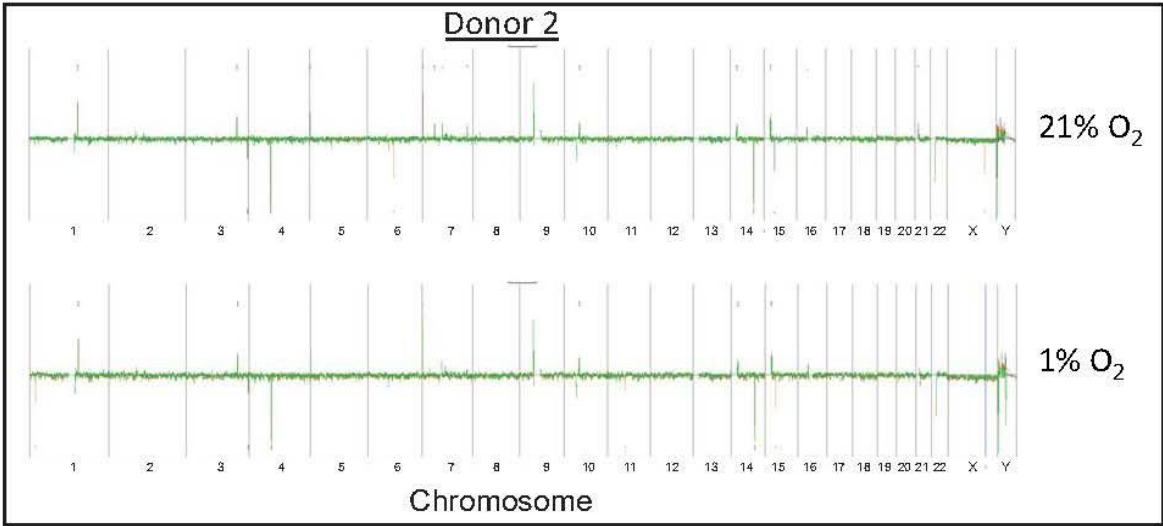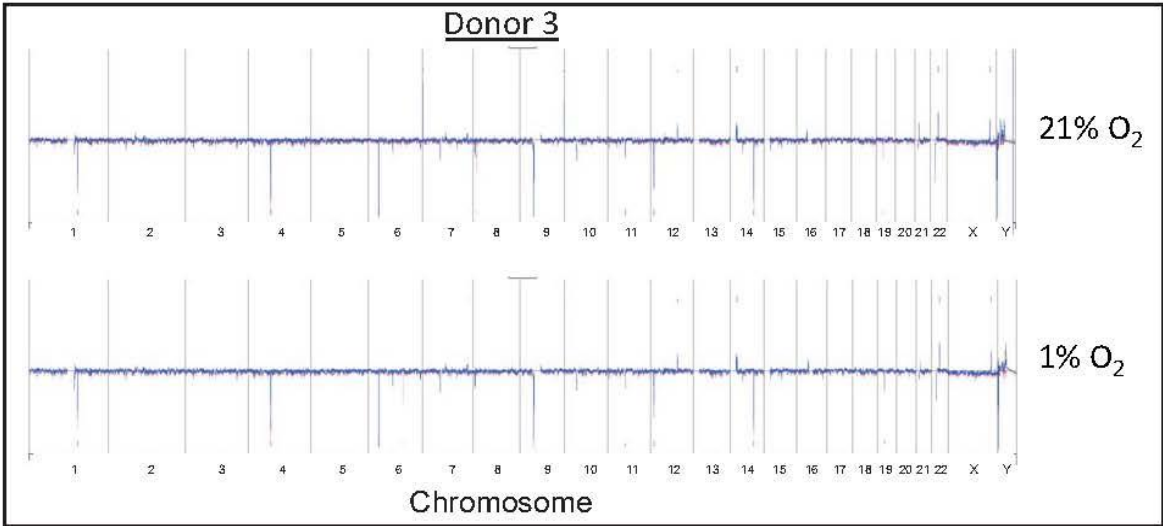

**Fig. S3.** ADSC do not present significant changes in DNA copy-number variations during long term *ex vivo* expansion. CGH array profiles for donor 1, donor 2 and donor 3. For donor-1, red line corresponds to P1; green line to P4 and blue line to P10. For donor-2, blue line corresponds to P1; orange line to P4 and green line to P10. For donor-3, green line corresponds to P1, pink line to P4 and blue line to P10.

Supplementary Table 1

| Gene Symbol | Gene Name                                                                                                 | EntrezGene ID             | Fold Change | FDR q-value |
|-------------|-----------------------------------------------------------------------------------------------------------|---------------------------|-------------|-------------|
| PPFIA4      | protein tyrosine phosphatase, receptor type, f polypeptide (PTPRF), interacting protein (liprin), alpha 4 | <a href="#">8497</a>      | 28.23257866 | 2.92E-52    |
| PK1         | pyruvate dehydrogenase kinase, isozyme 1                                                                  | <a href="#">5163</a>      | 5.540061532 | 1.80E-27    |
| ZNF395      | zinc finger protein 395                                                                                   | <a href="#">55893</a>     | 4.696747384 | 8.80E-27    |
| BNIP3P1     | BCL2/adenovirus E1B 19kDa interacting protein 3 pseudogene 1                                              | <a href="#">319138</a>    | 5.102562682 | 5.18E-19    |
| MIR210HG    | MIR210 host gene (non-protein coding)                                                                     | <a href="#">100506211</a> | 9.808197298 | 1.23E-17    |
| BNIP3       | BCL2/adenovirus E1B 19kDa interacting protein 3                                                           | <a href="#">664</a>       | 4.630702263 | 1.30E-16    |
| EVA1B       | eva-1 homolog B (C. elegans)                                                                              | <a href="#">55194</a>     | 3.497458648 | 1.40E-16    |
| VEPH1       | ventricular zone expressed PH domain homolog 1 (zebrafish)                                                | <a href="#">79674</a>     | 0.113236659 | 2.53E-16    |
| PIK3R6      | phosphoinositide-3-kinase, regulatory subunit 6                                                           | <a href="#">146850</a>    | 44.02749935 | 5.57E-16    |
| CSNK1D      | casein kinase 1, delta                                                                                    | <a href="#">1453</a>      | 6.742828949 | 6.74E-16    |
| SERPINE2    | serpin peptidase inhibitor, clade E (nexin, plasminogen activator inhibitor type 1), member 2             | <a href="#">5270</a>      | 0.103014762 | 1.03E-14    |
| TAF9B       | TAF9B RNA polymerase II, TATA box binding protein (TBP)-associated factor, 31kDa                          | <a href="#">51616</a>     | 6.127459315 | 4.02E-14    |
| SLC2A1-AS1  | SLC2A1 antisense RNA 1                                                                                    | <a href="#">440584</a>    | 3.805753181 | 5.00E-14    |
| SYNPO       | synaptopodin                                                                                              | <a href="#">11346</a>     | 8.435683691 | 3.32E-13    |
| PFKFB3      | 6-phosphofructo-2-kinase/fructose-2,6-biphosphatase 3                                                     | <a href="#">5209</a>      | 4.748335914 | 5.63E-13    |
| SLC2A1      | solute carrier family 2 (facilitated glucose transporter), member 1                                       | <a href="#">6513</a>      | 3.671709705 | 2.56E-12    |
| NT5DC1      | 5'-nucleotidase domain containing 1                                                                       | <a href="#">221294</a>    | 7.281718654 | 2.04E-10    |

## Supplementary Table 1

|           |                                                          |                           |             |          |
|-----------|----------------------------------------------------------|---------------------------|-------------|----------|
| LURAP1L   | leucine rich adaptor protein 1-like                      | <a href="#">286343</a>    | 0.100276886 | 3.31E-09 |
| AK4       | adenylate kinase 4                                       | <a href="#">205</a>       | 3.395113959 | 4.26E-09 |
| TREM1     | triggering receptor expressed on myeloid cells 1         | <a href="#">54210</a>     | 1544.260045 | 5.52E-09 |
| SLC17A9   | solute carrier family 17, member 9                       | <a href="#">63910</a>     | 5.460757154 | 8.56E-09 |
| MT-ND4L   | mitochondrially encoded NADH 4L dehydrogenase            | <a href="#">4539</a>      | 704.7901738 | 8.95E-09 |
| FTH1P2    | ferritin, heavy polypeptide 1 pseudogene 2               | <a href="#">2497</a>      | 0.425535088 | 8.95E-09 |
| BEST1     | bestrophin 1                                             | <a href="#">7439</a>      | 0.425216947 | 1.55E-08 |
| COL14A1   | collagen, type XIV, alpha 1                              | <a href="#">7373</a>      | 0.101882135 | 1.74E-08 |
| ASPN      | asporin                                                  | <a href="#">54829</a>     | 0.031522374 | 1.74E-08 |
| SPSB2     | splA/ryanodine receptor domain and SOCS box containing 2 | <a href="#">84727</a>     | 7.501655441 | 2.33E-08 |
| ANO1-AS1  | ANO1 antisense RNA 1                                     | <a href="#">100873981</a> | 22.60604962 | 2.68E-08 |
| KRTAP21-3 | keratin associated protein 21-3                          | <a href="#">100288323</a> | 114.6722103 | 2.70E-08 |
| FBLN7     | fibulin 7                                                | <a href="#">129804</a>    | 5.069094291 | 2.88E-08 |
| LDHA      | lactate dehydrogenase A                                  | <a href="#">3939</a>      | 2.159240586 | 4.03E-08 |
| PMEPA1    | prostate transmembrane protein, androgen induced 1       | <a href="#">56937</a>     | 3.441408137 | 6.52E-08 |
| PIK3R5    | phosphoinositide-3-kinase, regulatory subunit 5          | <a href="#">23533</a>     | 34.55182477 | 6.64E-08 |
| TPI1P1    | triosephosphate isomerase 1 pseudogene 1                 | <a href="#">729708</a>    | 2.218436103 | 7.48E-08 |
| RUVBL2    | RuvB-like 2 (E. coli)                                    | <a href="#">10856</a>     | 2.166717403 | 1.12E-07 |
| B4GALNT1  | beta-1,4-N-acetyl-galactosaminyl transferase 1           | <a href="#">2583</a>      | 4.674564615 | 1.87E-07 |
| RASSF2    | Ras association (RalGDS/AF-6) domain family member 2     | <a href="#">9770</a>      | 0.150159119 | 2.22E-07 |

## Supplementary Table 1

|          |                                                                                       |                        |             |          |
|----------|---------------------------------------------------------------------------------------|------------------------|-------------|----------|
| GPR1     | G protein-coupled receptor 1                                                          | <a href="#">2825</a>   | 0.176736142 | 3.54E-07 |
| HTRA3    | HtrA serine peptidase 3                                                               | <a href="#">94031</a>  | 0.225810112 | 3.63E-07 |
| CLU      | clusterin                                                                             | <a href="#">1191</a>   | 0.229976763 | 4.12E-07 |
| ENPP2    | ectonucleotide pyrophosphatase/phosphodiesterase 2                                    | <a href="#">5168</a>   | 0.268540576 | 4.59E-07 |
| ADD3     | adducin 3 (gamma)                                                                     | <a href="#">120</a>    | 0.41706698  | 6.76E-07 |
| CCL28    | chemokine (C-C motif) ligand 28                                                       | <a href="#">56477</a>  | 14.76877233 | 6.76E-07 |
| FAT4     | FAT tumor suppressor homolog 4 (Drosophila)                                           | <a href="#">79633</a>  | 0.270137906 | 7.68E-07 |
| ALDOA    | aldolase A, fructose-bisphosphate                                                     | <a href="#">226</a>    | 2.045701998 | 7.94E-07 |
| EGLN1    | egl nine homolog 1 (C. elegans)                                                       | <a href="#">54583</a>  | 1.94459619  | 7.94E-07 |
| VAT1L    | vesicle amine transport protein 1 homolog (T. californica)-like                       | <a href="#">57687</a>  | 4.06229497  | 8.30E-07 |
| IL11     | interleukin 11                                                                        | <a href="#">3589</a>   | 7.605293896 | 1.03E-06 |
| PTGS2    | prostaglandin-endoperoxide synthase 2 (prostaglandin G/H synthase and cyclooxygenase) | <a href="#">5743</a>   | 6.49733909  | 1.11E-06 |
| GCSAM    | germinal center-associated, signaling and motility                                    | <a href="#">257144</a> | 4.342711159 | 1.11E-06 |
| FTH1P20  | ferritin, heavy polypeptide 1 pseudogene 20                                           | <a href="#">729009</a> | 0.37386077  | 1.26E-06 |
| ZC3HAV1L | zinc finger CCCH-type, antiviral 1-like                                               | <a href="#">92092</a>  | 2.032662934 | 1.26E-06 |
| APLN     | apelin                                                                                | <a href="#">8862</a>   | 10.60360552 | 1.95E-06 |
| TGFBR3   | transforming growth factor, beta receptor III                                         | <a href="#">7049</a>   | 0.266011957 | 2.11E-06 |
| ACE      | angiotensin I converting enzyme (peptidyl-dipeptidase A) 1                            | <a href="#">1636</a>   | 0.189316754 | 2.11E-06 |
| MT-CYB   | mitochondrially encoded cytochrome b                                                  | <a href="#">4519</a>   | 8837.361594 | 2.32E-06 |



## Supplementary Table 1

|           |                                                                            |                           |             |          |
|-----------|----------------------------------------------------------------------------|---------------------------|-------------|----------|
| SECTM1    | secreted and transmembrane 1                                               | <a href="#">6398</a>      | 0.099958219 | 2.44E-06 |
| TSKU      | tsukushi small leucine rich proteoglycan homolog ( <i>Xenopus laevis</i> ) | <a href="#">25987</a>     | 2.225573273 | 2.68E-06 |
| DSP       | desmoplakin                                                                | <a href="#">1832</a>      | 5.302909031 | 2.87E-06 |
| MT-ND4    | mitochondrially encoded NADH dehydrogenase 4                               | <a href="#">4538</a>      | 10330.8404  | 2.88E-06 |
| MAP1A     | microtubule-associated protein 1A                                          | <a href="#">4130</a>      | 0.475867225 | 3.05E-06 |
| ANGPTL1   | angiopoietin-like 1                                                        | <a href="#">9068</a>      | 0.205685928 | 3.05E-06 |
| FHDC1     | FH2 domain containing 1                                                    | <a href="#">85462</a>     | 0.149888126 | 3.12E-06 |
| KIF21B    | kinesin family member 21B                                                  | <a href="#">23046</a>     | 11.74091548 | 3.32E-06 |
| STARD8    | StAR-related lipid transfer (START) domain containing 8                    | <a href="#">9754</a>      | 5.158769548 | 3.32E-06 |
| LINC00565 | long intergenic non-protein coding RNA 565                                 | <a href="#">100861555</a> | 2.859736061 | 3.32E-06 |
| AUTS2     | autism susceptibility candidate 2                                          | <a href="#">26053</a>     | 2.115683763 | 3.45E-06 |
| MLPH      | melanophilin                                                               | <a href="#">79083</a>     | 27.12832372 | 4.02E-06 |
| ASAP3     | ArfGAP with SH3 domain, ankyrin repeat and PH domain 3                     | <a href="#">55616</a>     | 0.313476457 | 4.38E-06 |
| PTPRF     | protein tyrosine phosphatase, receptor type, F                             | <a href="#">5792</a>      | 2.906822543 | 4.42E-06 |
| ALCAM     | activated leukocyte cell adhesion molecule                                 | <a href="#">214</a>       | 2.693798614 | 4.46E-06 |
| GPX3      | glutathione peroxidase 3 (plasma)                                          | <a href="#">2878</a>      | 1.986616777 | 5.70E-06 |
| CDCP1     | CUB domain containing protein 1                                            | <a href="#">64866</a>     | 7.952855731 | 5.95E-06 |
| ECM2      | extracellular matrix protein 2, female organ and adipocyte specific        | <a href="#">1842</a>      | 0.129774695 | 7.18E-06 |
| PPP1R3C   | protein phosphatase 1, regulatory subunit 3C                               | <a href="#">5507</a>      | 0.255881367 | 8.72E-06 |
| INHBA-AS1 | INHBA antisense RNA 1                                                      | <a href="#">285954</a>    | 4.711629183 | 1.05E-05 |

## Supplementary Table 1

|          |                                                                            |                        |             |          |
|----------|----------------------------------------------------------------------------|------------------------|-------------|----------|
| HS3ST3B1 | heparan sulfate (glucosamine) 3-O-sulfotransferase 3B1                     | <a href="#">9953</a>   | 2.211866021 | 1.05E-05 |
| NRIP3    | nuclear receptor interacting protein 3                                     | <a href="#">56675</a>  | 2.882073244 | 1.10E-05 |
| NOTCH3   | notch 3                                                                    | <a href="#">4854</a>   | 5.513834634 | 1.37E-05 |
| LMO4     | LIM domain only 4                                                          | <a href="#">8543</a>   | 2.171706289 | 1.38E-05 |
| SLC8A1   | solute carrier family 8 (sodium/calcium exchanger), member 1               | <a href="#">6546</a>   | 30.74114508 | 1.57E-05 |
| PLA2G16  | phospholipase A2, group XVI                                                | <a href="#">11145</a>  | 0.223768831 | 1.57E-05 |
| MPP2     | membrane protein, palmitoylated 2 (MAGUK p55 subfamily member 2)           | <a href="#">4355</a>   | 2.89631597  | 1.86E-05 |
| MYEOV    | myeloma overexpressed (in a subset of t(11;14) positive multiple myelomas) | <a href="#">26579</a>  | 5.960139095 | 2.05E-05 |
| THUMPD2  | THUMP domain containing 2                                                  | <a href="#">80745</a>  | 2.141421809 | 2.19E-05 |
| ENO1     | enolase 1, (alpha)                                                         | <a href="#">2023</a>   | 2.067639975 | 2.33E-05 |
| SLC38A1  | solute carrier family 38, member 1                                         | <a href="#">81539</a>  | 0.481644301 | 2.33E-05 |
| DTX3     | deltex homolog 3 (Drosophila)                                              | <a href="#">196403</a> | 1.920389696 | 2.43E-05 |
| VIL1     | villin 1                                                                   | <a href="#">7429</a>   | 1.925381989 | 2.86E-05 |
| PSG5     | pregnancy specific beta-1-glycoprotein 5                                   | <a href="#">5673</a>   | 10.90575692 | 3.04E-05 |
| ITGA11   | integrin, alpha 11                                                         | <a href="#">22801</a>  | 0.319333099 | 3.04E-05 |
| BCOR     | BCL6 corepressor                                                           | <a href="#">54880</a>  | 1.882441459 | 3.05E-05 |
| SAMD9L   | sterile alpha motif domain containing 9-like                               | <a href="#">219285</a> | 0.344555191 | 3.11E-05 |
| CTSC     | cathepsin C                                                                | <a href="#">1075</a>   | 0.455845235 | 3.22E-05 |
| INSIG2   | insulin induced gene 2                                                     | <a href="#">51141</a>  | 2.071610822 | 3.38E-05 |
| TLR3     | toll-like receptor 3                                                       | <a href="#">7098</a>   | 0.206713999 | 3.40E-05 |

## Supplementary Table 1

|          |                                                             |                           |             |          |
|----------|-------------------------------------------------------------|---------------------------|-------------|----------|
| CTH      | cystathionase (cystathionine gamma-lyase)                   | <a href="#">1491</a>      | 0.354087053 | 4.93E-05 |
| IGFBP4   | insulin-like growth factor binding protein 4                | <a href="#">3487</a>      | 0.486496051 | 5.13E-05 |
| PITRM1   | pitrilysin metalloproteinase 1                              | <a href="#">10531</a>     | 2.19577465  | 5.98E-05 |
| C21orf2  | chromosome 21 open reading frame 2                          | <a href="#">755</a>       | 2.100354721 | 6.03E-05 |
| EFEMP1   | EGF containing fibulin-like extracellular matrix protein 1  | <a href="#">2202</a>      | 0.202739485 | 6.03E-05 |
| STC1     | stanniocalcin 1                                             | <a href="#">6781</a>      | 21.73947206 | 6.07E-05 |
| SNAPC5   | small nuclear RNA activating complex, polypeptide 5, 19kDa  | <a href="#">10302</a>     | 1.936160297 | 6.49E-05 |
| RAB30    | RAB30, member RAS oncogene family                           | <a href="#">27314</a>     | 0.366407007 | 7.51E-05 |
| LGR4     | leucine-rich repeat containing G protein-coupled receptor 4 | <a href="#">55366</a>     | 0.210158105 | 7.63E-05 |
| IGFBPL1  | insulin-like growth factor binding protein-like 1           | <a href="#">347252</a>    | 10.16570947 | 7.67E-05 |
| HS3ST3A1 | heparan sulfate (glucosamine) 3-O-sulfotransferase 3A1      | <a href="#">9955</a>      | 2.492763476 | 7.67E-05 |
| GPI      | glucose-6-phosphate isomerase                               | <a href="#">2821</a>      | 1.910098583 | 7.67E-05 |
| RMDN2    | regulator of microtubule dynamics 2                         | <a href="#">151393</a>    | 0.099019673 | 7.78E-05 |
| DAB1     | disabled homolog 1 (Drosophila)                             | <a href="#">1600</a>      | 0.447382894 | 8.66E-05 |
| WNT7B    | wingless-type MMTV integration site family, member 7B       | <a href="#">7477</a>      | 6.430718777 | 1.02E-04 |
| RPL21P23 | ribosomal protein L21 pseudogene 23                         | <a href="#">100270879</a> | 0.330347653 | 1.06E-04 |
| CNKSR3   | CNKSR family member 3                                       | <a href="#">154043</a>    | 0.301992578 | 1.17E-04 |
| CMBL     | carboxymethylenebutenolidase homolog (Pseudomonas)          | <a href="#">134147</a>    | 0.480268802 | 1.17E-04 |
| ORC4     | origin recognition complex, subunit 4                       | <a href="#">5000</a>      | 0.266621865 | 1.17E-04 |
| GDNF     | glial cell derived neurotrophic factor                      | <a href="#">2668</a>      | 5.076288275 | 1.19E-04 |

## Supplementary Table 1

|            |                                                           |                           |             |          |
|------------|-----------------------------------------------------------|---------------------------|-------------|----------|
| RTN4IP1    | reticulon 4 interacting protein 1                         | <a href="#">84816</a>     | 0.446185953 | 1.44E-04 |
| DCLK1      | doublecortin-like kinase 1                                | <a href="#">9201</a>      | 0.224665266 | 1.53E-04 |
| ZNF710     | zinc finger protein 710                                   | <a href="#">374655</a>    | 2.199829941 | 1.79E-04 |
| DNAH11     | dynein, axonemal, heavy chain 11                          | <a href="#">8701</a>      | 1.771093896 | 1.83E-04 |
| MBNL1      | muscleblind-like splicing regulator 1                     | <a href="#">4154</a>      | 0.433974747 | 1.83E-04 |
| PI16       | peptidase inhibitor 16                                    | <a href="#">221476</a>    | 0.074207149 | 1.83E-04 |
| C4orf3     | chromosome 4 open reading frame 3                         | <a href="#">401152</a>    | 1.832802841 | 1.85E-04 |
| CCDC152    | coiled-coil domain containing 152                         | <a href="#">100129792</a> | 0.071574773 | 2.02E-04 |
| TRAK1      | trafficking protein, kinesin binding 1                    | <a href="#">22906</a>     | 0.519676959 | 2.03E-04 |
| PGM1       | phosphoglucomutase 1                                      | <a href="#">5236</a>      | 1.822381365 | 2.08E-04 |
| ZNF229     | zinc finger protein 229                                   | <a href="#">7772</a>      | 0.236550317 | 2.31E-04 |
| PARP14     | poly (ADP-ribose) polymerase family, member 14            | <a href="#">54625</a>     | 0.506878825 | 2.41E-04 |
| CDKN2B     | cyclin-dependent kinase inhibitor 2B (p15, inhibits CDK4) | <a href="#">1030</a>      | 0.231154123 | 2.46E-04 |
| IL20RB-AS1 | IL20RB antisense RNA 1                                    | <a href="#">100862678</a> | 0.375142339 | 2.75E-04 |
| OMD        | osteomodulin                                              | <a href="#">4958</a>      | 0.02237172  | 2.76E-04 |
| SQRDL      | sulfide quinone reductase-like (yeast)                    | <a href="#">58472</a>     | 0.380208318 | 2.81E-04 |
| EPAS1      | endothelial PAS domain protein 1                          | <a href="#">2034</a>      | 0.416560515 | 3.02E-04 |
| BEND5      | BEN domain containing 5                                   | <a href="#">79656</a>     | 11.57787034 | 3.05E-04 |
| P4HA2-AS1  | P4HA2 antisense RNA 1                                     | <a href="#">100861518</a> | 1.954531045 | 3.05E-04 |
| LDHAP7     | lactate dehydrogenase A pseudogene 7                      | <a href="#">100190800</a> | 2.144630342 | 3.05E-04 |

Supplementary Table 1

|           |                                                                                           |                        |             |          |
|-----------|-------------------------------------------------------------------------------------------|------------------------|-------------|----------|
| CACNB4    | calcium channel, voltage-dependent, beta 4 subunit                                        | <a href="#">785</a>    | 0.153734727 | 3.05E-04 |
| MCU       | mitochondrial calcium uniporter                                                           | <a href="#">90550</a>  | 0.513189337 | 3.14E-04 |
| PTK7      | PTK7 protein tyrosine kinase 7                                                            | <a href="#">5754</a>   | 2.123836931 | 3.23E-04 |
| SPA17     | sperm autoantigenic protein 17                                                            | <a href="#">53340</a>  | 0.548349531 | 3.26E-04 |
| CREG1     | cellular repressor of E1A-stimulated genes 1                                              | <a href="#">8804</a>   | 0.448244877 | 3.43E-04 |
| ME1       | malic enzyme 1, NADP(+)-dependent, cytosolic                                              | <a href="#">4199</a>   | 0.481627942 | 3.47E-04 |
| KCNA3     | potassium voltage-gated channel, shaker-related subfamily, member 3                       | <a href="#">3738</a>   | 4.113897931 | 3.71E-04 |
| UBE2L6    | ubiquitin-conjugating enzyme E2L 6                                                        | <a href="#">9246</a>   | 0.489129031 | 4.18E-04 |
| TNFRSF10D | tumor necrosis factor receptor superfamily, member 10d, decoy with truncated death domain | <a href="#">8793</a>   | 3.35735013  | 4.31E-04 |
| RHOJ      | ras homolog family member J                                                               | <a href="#">57381</a>  | 0.418840251 | 4.78E-04 |
| RNF145    | ring finger protein 145                                                                   | <a href="#">153830</a> | 1.650282031 | 5.13E-04 |
| IFI35     | interferon-induced protein 35                                                             | <a href="#">3430</a>   | 0.584295993 | 5.17E-04 |
| ISCU      | iron-sulfur cluster scaffold homolog (E. coli)                                            | <a href="#">23479</a>  | 0.604760744 | 5.28E-04 |
| GABRE     | gamma-aminobutyric acid (GABA) A receptor, epsilon                                        | <a href="#">2564</a>   | 0.35470658  | 5.28E-04 |
| ST3GAL5   | ST3 beta-galactoside alpha-2,3-sialyltransferase 5                                        | <a href="#">8869</a>   | 0.349371783 | 5.48E-04 |
| VAT1      | vesicle amine transport protein 1 homolog (T. californica)                                | <a href="#">10493</a>  | 0.586573703 | 5.64E-04 |
| TMEM63A   | transmembrane protein 63A                                                                 | <a href="#">9725</a>   | 0.457711359 | 5.74E-04 |
| DUSP4     | dual specificity phosphatase 4                                                            | <a href="#">1846</a>   | 6.382873253 | 5.79E-04 |
| AIF1L     | allograft inflammatory factor 1-like                                                      | <a href="#">83543</a>  | 0.046994769 | 5.98E-04 |

## Supplementary Table 1

|          |                                                                   |                           |             |          |
|----------|-------------------------------------------------------------------|---------------------------|-------------|----------|
| PGAM1P5  | phosphoglycerate mutase 1 pseudogene 5                            | <a href="#">100132594</a> | 0.1332846   | 6.06E-04 |
| FAM198B  | family with sequence similarity 198, member B                     | <a href="#">51313</a>     | 0.541146605 | 6.09E-04 |
| SLC5A10  | solute carrier family 5 (sodium/glucose cotransporter), member 10 | <a href="#">125206</a>    | 2.073613477 | 6.56E-04 |
| RNF215   | ring finger protein 215                                           | <a href="#">200312</a>    | 1.928032272 | 6.56E-04 |
| C1orf170 | chromosome 1 open reading frame 170                               | <a href="#">84808</a>     | 3.2906441   | 6.82E-04 |
| CASP1    | caspace 1, apoptosis-related cysteine peptidase                   | <a href="#">834</a>       | 0.307234259 | 6.82E-04 |
| NCOA7    | nuclear receptor coactivator 7                                    | <a href="#">135112</a>    | 0.529435265 | 6.85E-04 |
| TLDC2    | TBC/LysM-associated domain containing 2                           | <a href="#">140711</a>    | 0.560475727 | 7.00E-04 |
| MIR3124  | microRNA 3124                                                     | <a href="#">100422879</a> | 2.168845072 | 7.14E-04 |
| PFKL     | phosphofructokinase, liver                                        | <a href="#">5211</a>      | 2.015603686 | 7.30E-04 |
| EXTL1    | exostoses (multiple)-like 1                                       | <a href="#">2134</a>      | 4.847302104 | 7.72E-04 |
| LZTS1    | leucine zipper, putative tumor suppressor 1                       | <a href="#">11178</a>     | 2.981493104 | 7.72E-04 |
| AHNAK2   | AHNAK nucleoprotein 2                                             | <a href="#">113146</a>    | 0.428125597 | 8.16E-04 |
| MMS22L   | MMS22-like, DNA repair protein                                    | <a href="#">253714</a>    | 2.019865179 | 8.57E-04 |
| GSTA4    | glutathione S-transferase alpha 4                                 | <a href="#">2941</a>      | 0.608983608 | 8.62E-04 |
| SSTR1    | somatostatin receptor 1                                           | <a href="#">6751</a>      | 7.736741117 | 8.82E-04 |
| TPGS2    | tubulin polyglutamylase complex subunit 2                         | <a href="#">25941</a>     | 1.970267069 | 8.95E-04 |
| CAMKK1   | calcium/calmodulin-dependent protein kinase kinase 1, alpha       | <a href="#">84254</a>     | 3.135370645 | 9.72E-04 |
| SLC7A14  | solute carrier family 7 (orphan transporter), member 14           | <a href="#">57709</a>     | 0.374362025 | 9.82E-04 |
| MGST3    | microsomal glutathione S-transferase 3                            | <a href="#">4259</a>      | 0.627973245 | 1.06E-03 |

## Supplementary Table 1

|           |                                                                    |                           |             |          |
|-----------|--------------------------------------------------------------------|---------------------------|-------------|----------|
| NTF3      | neurotrophin 3                                                     | <a href="#">4908</a>      | 3.342614546 | 1.08E-03 |
| SAMD9     | sterile alpha motif domain containing 9                            | <a href="#">54809</a>     | 0.452431097 | 1.11E-03 |
| DNAJC19P1 | DnaJ (Hsp40) homolog, subfamily C, member 19 pseudogene 1          | <a href="#">100129853</a> | 0.242663159 | 1.11E-03 |
| KDM3A     | lysine (K)-specific demethylase 3A                                 | <a href="#">55818</a>     | 1.672504277 | 1.14E-03 |
| SHROOM2   | shroom family member 2                                             | <a href="#">357</a>       | 9.846738876 | 1.17E-03 |
| CYP21A2   | cytochrome P450, family 21, subfamily A, polypeptide 2             | <a href="#">1589</a>      | 0.020067518 | 1.18E-03 |
| SGK223    | homolog of rat pragma of Rnd2                                      | <a href="#">157285</a>    | 2.252114223 | 1.23E-03 |
| PEG10     | paternally expressed 10                                            | <a href="#">23089</a>     | 0.479818936 | 1.23E-03 |
| OSR2      | odd-skipped related 2 (Drosophila)                                 | <a href="#">116039</a>    | 0.269938376 | 1.23E-03 |
| SEMA7A    | semaphorin 7A, GPI membrane anchor (John Milton Hagen blood group) | <a href="#">8482</a>      | 4.148066434 | 1.25E-03 |
| APCDD1L   | adenomatosis polyposis coli down-regulated 1-like                  | <a href="#">164284</a>    | 3.157997436 | 1.25E-03 |
| MYBL1     | v-myb myeloblastosis viral oncogene homolog (avian)-like 1         | <a href="#">4603</a>      | 2.55220462  | 1.27E-03 |
| MT-ND5    | mitochondrially encoded NADH dehydrogenase 5                       | <a href="#">4540</a>      | 7.057831562 | 1.38E-03 |
| PDE4D     | phosphodiesterase 4D, cAMP-specific                                | <a href="#">5144</a>      | 2.847654268 | 1.47E-03 |
| WDR63     | WD repeat domain 63                                                | <a href="#">126820</a>    | 0.247680123 | 1.57E-03 |
| PGD       | phosphogluconate dehydrogenase                                     | <a href="#">5226</a>      | 0.53034604  | 1.63E-03 |
| SCARA5    | scavenger receptor class A, member 5 (putative)                    | <a href="#">286133</a>    | 0.010000383 | 1.71E-03 |
| CMTM4     | CKLF-like MARVEL transmembrane domain containing 4                 | <a href="#">146223</a>    | 1.645893629 | 1.72E-03 |
| DCK       | deoxycytidine kinase                                               | <a href="#">1633</a>      | 2.053433177 | 1.75E-03 |
| C19orf60  | chromosome 19 open reading frame 60                                | <a href="#">55049</a>     | 2.585590854 | 1.78E-03 |

## Supplementary Table 1

|          |                                                          |                        |             |          |
|----------|----------------------------------------------------------|------------------------|-------------|----------|
| NRBF2    | nuclear receptor binding factor 2                        | <a href="#">29982</a>  | 0.59468995  | 1.85E-03 |
| PAPD7    | PAP associated domain containing 7                       | <a href="#">11044</a>  | 1.610440322 | 1.85E-03 |
| HAS2     | hyaluronan synthase 2                                    | <a href="#">3037</a>   | 3.318892728 | 1.89E-03 |
| IDH1     | isocitrate dehydrogenase 1 (NADP+), soluble              | <a href="#">3417</a>   | 0.578957038 | 1.93E-03 |
| IFFO1    | intermediate filament family orphan 1                    | <a href="#">25900</a>  | 1.618620867 | 1.95E-03 |
| CLDN11   | claudin 11                                               | <a href="#">5010</a>   | 0.382656815 | 1.95E-03 |
| GULP1    | GULP, engulfment adaptor PTB domain containing 1         | <a href="#">51454</a>  | 0.297824016 | 1.95E-03 |
| XYLT2    | xylosyltransferase II                                    | <a href="#">64132</a>  | 1.996464612 | 1.96E-03 |
| SIPA1L1  | signal-induced proliferation-associated 1 like 1         | <a href="#">26037</a>  | 1.867799375 | 1.96E-03 |
| MGST1    | microsomal glutathione S-transferase 1                   | <a href="#">4257</a>   | 0.593888046 | 1.96E-03 |
| PTGIS    | prostaglandin I2 (prostacyclin) synthase                 | <a href="#">5740</a>   | 0.200281768 | 1.96E-03 |
| PKMYT1   | protein kinase, membrane associated tyrosine/threonine 1 | <a href="#">9088</a>   | 2.868580491 | 2.04E-03 |
| S100A10  | S100 calcium binding protein A10                         | <a href="#">6281</a>   | 0.500172935 | 2.04E-03 |
| HAS2-AS1 | HAS2 antisense RNA 1                                     | <a href="#">594842</a> | 3.283742499 | 2.05E-03 |
| FLRT2    | fibronectin leucine rich transmembrane protein 2         | <a href="#">23768</a>  | 0.464074715 | 2.05E-03 |
| SPATA6L  | spermatogenesis associated 6-like                        | <a href="#">55064</a>  | 2.166056688 | 2.14E-03 |
| FAM46A   | family with sequence similarity 46, member A             | <a href="#">55603</a>  | 0.529077841 | 2.14E-03 |
| ADAM19   | ADAM metallopeptidase domain 19                          | <a href="#">8728</a>   | 2.591517256 | 2.19E-03 |
| RS1      | retinoschisin 1                                          | <a href="#">6247</a>   | 1.742486526 | 2.20E-03 |
| LRRC8D   | leucine rich repeat containing 8 family, member D        | <a href="#">55144</a>  | 0.554126128 | 2.24E-03 |



## Supplementary Table 1

|           |                                                                     |                           |             |          |
|-----------|---------------------------------------------------------------------|---------------------------|-------------|----------|
| SLC4A4    | solute carrier family 4, sodium bicarbonate cotransporter, member 4 | <a href="#">8671</a>      | 1.869107828 | 2.41E-03 |
| PTGFR     | prostaglandin F receptor (FP)                                       | <a href="#">5737</a>      | 0.265849194 | 2.43E-03 |
| CXADR     | coxsackie virus and adenovirus receptor                             | <a href="#">1525</a>      | 1.731605994 | 2.43E-03 |
| FAM129B   | family with sequence similarity 129, member B                       | <a href="#">64855</a>     | 1.930783362 | 2.45E-03 |
| COL27A1   | collagen, type XXVII, alpha 1                                       | <a href="#">85301</a>     | 2.056783583 | 2.50E-03 |
| COPA      | coatomer protein complex, subunit alpha                             | <a href="#">1314</a>      | 0.654285317 | 2.50E-03 |
| COL7A1    | collagen, type VII, alpha 1                                         | <a href="#">1294</a>      | 2.497883168 | 2.55E-03 |
| LRRN4CL   | LRRN4 C-terminal like                                               | <a href="#">221091</a>    | 0.152060569 | 2.55E-03 |
| SDC4      | syndecan 4                                                          | <a href="#">6385</a>      | 1.778258796 | 2.55E-03 |
| BRIP1     | BRCA1 interacting protein C-terminal helicase 1                     | <a href="#">83990</a>     | 2.042866602 | 2.63E-03 |
| DUTP2     | deoxyuridine triphosphatase pseudogene 2                            | <a href="#">100873909</a> | 1.972697575 | 2.64E-03 |
| CCDC158   | coiled-coil domain containing 158                                   | <a href="#">339965</a>    | 2.20137969  | 2.65E-03 |
| KIAA1715  | KIAA1715                                                            | <a href="#">80856</a>     | 1.61537207  | 2.66E-03 |
| LINC00702 | long intergenic non-protein coding RNA 702                          | <a href="#">100652988</a> | 2.053882999 | 2.73E-03 |
| FAM129A   | family with sequence similarity 129, member A                       | <a href="#">116496</a>    | 0.524079107 | 2.74E-03 |
| SERPINB2  | serpin peptidase inhibitor, clade B (ovalbumin), member 2           | <a href="#">5055</a>      | 17.19813238 | 2.76E-03 |
| PLOD1     | procollagen-lysine, 2-oxoglutarate 5-dioxygenase 1                  | <a href="#">5351</a>      | 1.787208683 | 2.93E-03 |
| XPNPEP2   | X-prolyl aminopeptidase (aminopeptidase P) 2, membrane-bound        | <a href="#">7512</a>      | 0.196248972 | 2.94E-03 |
| MR1       | major histocompatibility complex, class I-related                   | <a href="#">3140</a>      | 0.548984377 | 2.97E-03 |
| ANXA4     | annexin A4                                                          | <a href="#">307</a>       | 0.617769478 | 2.99E-03 |

## Supplementary Table 1

|             |                                                              |                        |             |          |
|-------------|--------------------------------------------------------------|------------------------|-------------|----------|
| GRHL1       | grainyhead-like 1 (Drosophila)                               | <a href="#">29841</a>  | 0.222229462 | 2.99E-03 |
| PAPPA-AS1   | PAPPA antisense RNA 1                                        | <a href="#">493913</a> | 0.398197757 | 3.00E-03 |
| ZNF224      | zinc finger protein 224                                      | <a href="#">7767</a>   | 0.258137206 | 3.00E-03 |
| H6PD        | hexose-6-phosphate dehydrogenase (glucose 1-dehydrogenase)   | <a href="#">9563</a>   | 1.712412177 | 3.11E-03 |
| E2F7        | E2F transcription factor 7                                   | <a href="#">144455</a> | 2.776098966 | 3.12E-03 |
| FOXC1       | forkhead box C1                                              | <a href="#">2296</a>   | 0.412474833 | 3.13E-03 |
| HILPDA      | hypoxia inducible lipid droplet-associated                   | <a href="#">29923</a>  | 1.900653178 | 3.15E-03 |
| RGS16       | regulator of G-protein signaling 16                          | <a href="#">6004</a>   | 5.843906112 | 3.15E-03 |
| ORAOV1      | oral cancer overexpressed 1                                  | <a href="#">220064</a> | 2.6334444   | 3.15E-03 |
| LDHAP4      | lactate dehydrogenase A pseudogene 4                         | <a href="#">158222</a> | 2.132855164 | 3.18E-03 |
| ATP6VOA1    | ATPase, H <sup>+</sup> transporting, lysosomal V0 subunit a1 | <a href="#">535</a>    | 0.620469414 | 3.18E-03 |
| HSPA2       | heat shock 70kDa protein 2                                   | <a href="#">3306</a>   | 3.256061614 | 3.18E-03 |
| SMAD3       | SMAD family member 3                                         | <a href="#">4088</a>   | 0.487288811 | 3.21E-03 |
| SLC7A11-AS1 | SLC7A11 antisense RNA 1                                      | <a href="#">641364</a> | 0.444283356 | 3.25E-03 |
| PDE1A       | phosphodiesterase 1A, calmodulin-dependent                   | <a href="#">5136</a>   | 0.225396185 | 3.27E-03 |
| TNIK        | TRAF2 and NCK interacting kinase                             | <a href="#">23043</a>  | 0.363927506 | 3.30E-03 |
| NET1        | neuroepithelial cell transforming 1                          | <a href="#">10276</a>  | 2.178302025 | 3.35E-03 |
| ERG         | v-ets erythroblastosis virus E26 oncogene homolog (avian)    | <a href="#">2078</a>   | 7.346138011 | 3.46E-03 |
| EFNB2       | ephrin-B2                                                    | <a href="#">1948</a>   | 4.852543009 | 3.46E-03 |
| ASAH1       | N-acylsphingosine amidohydrolase (acid ceramidase) 1         | <a href="#">427</a>    | 0.617920268 | 3.51E-03 |

## Supplementary Table 1

|            |                                                           |                           |             |          |
|------------|-----------------------------------------------------------|---------------------------|-------------|----------|
| CAMK1D     | calcium/calmodulin-dependent protein kinase ID            | <a href="#">57118</a>     | 0.291632821 | 3.53E-03 |
| STAT1      | signal transducer and activator of transcription 1, 91kDa | <a href="#">6772</a>      | 0.283761743 | 3.56E-03 |
| CADPS      | Ca <sup>++</sup> -dependent secretion activator           | <a href="#">8618</a>      | 8.144787168 | 3.61E-03 |
| MMP14      | matrix metalloproteinase 14 (membrane-inserted)           | <a href="#">4323</a>      | 2.134809002 | 3.69E-03 |
| NUPL1      | nucleoporin like 1                                        | <a href="#">9818</a>      | 1.709972353 | 3.77E-03 |
| HEATR1     | HEAT repeat containing 1                                  | <a href="#">55127</a>     | 1.568819421 | 3.77E-03 |
| ZNF608     | zinc finger protein 608                                   | <a href="#">57507</a>     | 0.226552136 | 3.77E-03 |
| SORBS1     | sorbin and SH3 domain containing 1                        | <a href="#">10580</a>     | 2.54499355  | 3.87E-03 |
| CENPJ      | centromere protein J                                      | <a href="#">55835</a>     | 1.853028666 | 3.87E-03 |
| MRPL51     | mitochondrial ribosomal protein L51                       | <a href="#">51258</a>     | 1.56701273  | 3.92E-03 |
| GLT8D2     | glycosyltransferase 8 domain containing 2                 | <a href="#">83468</a>     | 0.557496634 | 3.92E-03 |
| IL1RN      | interleukin 1 receptor antagonist                         | <a href="#">3557</a>      | 15.81400631 | 4.00E-03 |
| PIGB       | phosphatidylinositol glycan anchor biosynthesis, class B  | <a href="#">9488</a>      | 0.532020816 | 4.05E-03 |
| MTR        | 5-methyltetrahydrofolate-homocysteine methyltransferase   | <a href="#">4548</a>      | 1.531242524 | 4.19E-03 |
| A2M        | alpha-2-macroglobulin                                     | <a href="#">2</a>         | 3.748748397 | 4.35E-03 |
| SLC8A1-AS1 | SLC8A1 antisense RNA 1                                    | <a href="#">100128590</a> | 2.80107381  | 4.38E-03 |
| MZT1       | mitotic spindle organizing protein 1                      | <a href="#">440145</a>    | 1.691951132 | 4.39E-03 |
| FOXP4      | forkhead box P4                                           | <a href="#">116113</a>    | 1.791038811 | 4.51E-03 |
| WFDC13     | WAP four-disulfide core domain 13                         | <a href="#">164237</a>    | 4.601314283 | 4.61E-03 |
| ARAP3      | ArfGAP with RhoGAP domain, ankyrin repeat and PH domain 3 | <a href="#">64411</a>     | 2.04098418  | 4.61E-03 |

Supplementary Table 1

|            |                                                                  |                           |             |          |
|------------|------------------------------------------------------------------|---------------------------|-------------|----------|
| TMEM194A   | transmembrane protein 194A                                       | <a href="#">23306</a>     | 1.863794243 | 4.61E-03 |
| GJC1       | gap junction protein, gamma 1, 45kDa                             | <a href="#">10052</a>     | 1.859288054 | 4.61E-03 |
| NT5E       | 5'-nucleotidase, ecto (CD73)                                     | <a href="#">4907</a>      | 1.783988728 | 4.61E-03 |
| ZNF292     | zinc finger protein 292                                          | <a href="#">23036</a>     | 1.599694706 | 4.61E-03 |
| TMEM119    | transmembrane protein 119                                        | <a href="#">338773</a>    | 0.415571321 | 4.61E-03 |
| ABHD4      | abhydrolase domain containing 4                                  | <a href="#">63874</a>     | 0.353410302 | 4.61E-03 |
| CD274      | CD274 molecule                                                   | <a href="#">29126</a>     | 5.693634962 | 4.62E-03 |
| GRIA3      | glutamate receptor, ionotropic, AMPA 3                           | <a href="#">2892</a>      | 2.458112594 | 4.73E-03 |
| ASS1       | argininosuccinate synthase 1                                     | <a href="#">445</a>       | 0.365749805 | 4.83E-03 |
| MGLL       | monoglyceride lipase                                             | <a href="#">11343</a>     | 1.690868307 | 4.86E-03 |
| FAM115C    | family with sequence similarity 115, member C                    | <a href="#">285966</a>    | 4.30555435  | 4.88E-03 |
| DIAPH3-AS1 | DIAPH3 antisense RNA 1                                           | <a href="#">100874195</a> | 1.789603893 | 4.88E-03 |
| FBLN1      | fibulin 1                                                        | <a href="#">2192</a>      | 0.485153438 | 4.88E-03 |
| ITPRIPL1   | inositol 1,4,5-trisphosphate receptor interacting protein-like 1 | <a href="#">150771</a>    | 3.467430582 | 4.94E-03 |
| CSF1       | colony stimulating factor 1 (macrophage)                         | <a href="#">1435</a>      | 0.558258803 | 4.94E-03 |
| C11orf89   | chromosome 11 open reading frame 89                              | <a href="#">728008</a>    | 0.233425164 | 4.94E-03 |
| POLD3      | polymerase (DNA-directed), delta 3, accessory subunit            | <a href="#">10714</a>     | 1.739798348 | 4.97E-03 |
| CFH        | complement factor H                                              | <a href="#">3075</a>      | 0.328522252 | 5.08E-03 |
| CHAC1      | ChaC, cation transport regulator homolog 1 (E. coli)             | <a href="#">79094</a>     | 0.330722705 | 5.23E-03 |
| HK2P1      | hexokinase 2 pseudogene 1                                        | <a href="#">642546</a>    | 4.055157643 | 5.32E-03 |

## Supplementary Table 1

|         |                                                                                                                                                  |                        |             |          |
|---------|--------------------------------------------------------------------------------------------------------------------------------------------------|------------------------|-------------|----------|
| C2CD2   | C2 calcium-dependent domain containing 2                                                                                                         | <a href="#">25966</a>  | 2.240143264 | 5.32E-03 |
| ARSG    | arylsulfatase G                                                                                                                                  | <a href="#">22901</a>  | 0.623404425 | 5.32E-03 |
| AP1G2   | adaptor-related protein complex 1, gamma 2 subunit                                                                                               | <a href="#">8906</a>   | 0.547130733 | 5.32E-03 |
| ITGA3   | integrin, alpha 3 (antigen CD49C, alpha 3 subunit of VLA-3 receptor)                                                                             | <a href="#">3675</a>   | 3.713969583 | 5.35E-03 |
| WDR62   | WD repeat domain 62                                                                                                                              | <a href="#">284403</a> | 2.370957825 | 5.43E-03 |
| PAPPA2  | pappalysin 2                                                                                                                                     | <a href="#">60676</a>  | 0.367793528 | 5.48E-03 |
| LRRC16A | leucine rich repeat containing 16A                                                                                                               | <a href="#">55604</a>  | 0.513824683 | 5.57E-03 |
| TTC39B  | tetratricopeptide repeat domain 39B                                                                                                              | <a href="#">158219</a> | 0.56457995  | 5.61E-03 |
| LEPREL1 | leprecan-like 1                                                                                                                                  | <a href="#">55214</a>  | 2.521927846 | 5.61E-03 |
| LRRC3   | leucine rich repeat containing 3                                                                                                                 | <a href="#">81543</a>  | 3.763985316 | 5.62E-03 |
| PPP1R3G | protein phosphatase 1, regulatory subunit 3G                                                                                                     | <a href="#">648791</a> | 2.65660917  | 5.85E-03 |
| CLEC14A | C-type lectin domain family 14, member A                                                                                                         | <a href="#">161198</a> | 7.477956091 | 5.85E-03 |
| ZNF672  | zinc finger protein 672                                                                                                                          | <a href="#">79894</a>  | 2.122444751 | 5.85E-03 |
| PSAT1   | phosphoserine aminotransferase 1                                                                                                                 | <a href="#">29968</a>  | 0.551443621 | 5.89E-03 |
| AKR1C2  | aldo-keto reductase family 1, member C2 (dihydrodiol dehydrogenase 2; bile acid binding protein; 3-alpha hydroxysteroid dehydrogenase, type III) | <a href="#">1646</a>   | 0.397409427 | 6.06E-03 |
| RGL1    | ral guanine nucleotide dissociation stimulator-like 1                                                                                            | <a href="#">23179</a>  | 0.531252194 | 6.15E-03 |
| RAB3B   | RAB3B, member RAS oncogene family                                                                                                                | <a href="#">5865</a>   | 1.808003788 | 6.25E-03 |
| ANK2    | ankyrin 2, neuronal                                                                                                                              | <a href="#">287</a>    | 0.536870411 | 6.38E-03 |
| SYNPO2  | synaptopodin 2                                                                                                                                   | <a href="#">171024</a> | 0.249083783 | 6.50E-03 |

## Supplementary Table 1

|          |                                                                 |                        |             |          |
|----------|-----------------------------------------------------------------|------------------------|-------------|----------|
| APBA2    | amyloid beta (A4) precursor protein-binding, family A, member 2 | <a href="#">321</a>    | 3.024823578 | 6.65E-03 |
| TRANK1   | tetratricopeptide repeat and ankyrin repeat containing 1        | <a href="#">9881</a>   | 0.468374033 | 6.65E-03 |
| LSP1     | lymphocyte-specific protein 1                                   | <a href="#">4046</a>   | 0.07034287  | 6.84E-03 |
| CACNA1A  | calcium channel, voltage-dependent, P/Q type, alpha 1A subunit  | <a href="#">773</a>    | 3.173520144 | 7.24E-03 |
| UHRF1    | ubiquitin-like with PHD and ring finger domains 1               | <a href="#">29128</a>  | 2.096251767 | 7.49E-03 |
| TMEM45A  | transmembrane protein 45A                                       | <a href="#">55076</a>  | 1.827061377 | 7.49E-03 |
| FAM127C  | family with sequence similarity 127, member C                   | <a href="#">441518</a> | 1.683380138 | 7.63E-03 |
| SESN2    | sestrin 2                                                       | <a href="#">83667</a>  | 0.507403262 | 7.63E-03 |
| PPAPDC1A | phosphatidic acid phosphatase type 2 domain containing 1A       | <a href="#">196051</a> | 4.797018489 | 7.65E-03 |
| MYBL2    | v-myb myeloblastosis viral oncogene homolog (avian)-like 2      | <a href="#">4605</a>   | 2.04005776  | 7.65E-03 |
| XAF1     | XIAP associated factor 1                                        | <a href="#">54739</a>  | 0.550604879 | 7.65E-03 |
| HNMT     | histamine N-methyltransferase                                   | <a href="#">3176</a>   | 0.394283434 | 7.65E-03 |
| RLBP1    | retinaldehyde binding protein 1                                 | <a href="#">6017</a>   | 1.940476821 | 7.67E-03 |
| RCAN1    | regulator of calcineurin 1                                      | <a href="#">1827</a>   | 1.856607691 | 7.67E-03 |
| C9orf24  | chromosome 9 open reading frame 24                              | <a href="#">84688</a>  | 1.606621625 | 7.67E-03 |
| COL18A1  | collagen, type XVIII, alpha 1                                   | <a href="#">80781</a>  | 2.170845421 | 7.73E-03 |
| INCENP   | inner centromere protein antigens 135/155kDa                    | <a href="#">3619</a>   | 1.819693537 | 7.83E-03 |
| GLRA2    | glycine receptor, alpha 2                                       | <a href="#">2742</a>   | 2.773325591 | 7.83E-03 |
| CASP8AP2 | caspase 8 associated protein 2                                  | <a href="#">9994</a>   | 1.556773762 | 7.83E-03 |
| TRIM5    | tripartite motif containing 5                                   | <a href="#">85363</a>  | 0.611095431 | 7.87E-03 |

Supplementary Table 1

|          |                                                  |                           |             |          |
|----------|--------------------------------------------------|---------------------------|-------------|----------|
| EDNRA    | endothelin receptor type A                       | <a href="#">1909</a>      | 3.787621058 | 7.91E-03 |
| MIR4524B | microRNA 4524b                                   | <a href="#">100847008</a> | 0.208279824 | 7.94E-03 |
| NCAPG2   | non-SMC condensin II complex, subunit G2         | <a href="#">54892</a>     | 1.866004933 | 7.99E-03 |
| PLK2     | polo-like kinase 2                               | <a href="#">10769</a>     | 0.515377622 | 7.99E-03 |
| GAMT     | guanidinoacetate N-methyltransferase             | <a href="#">2593</a>      | 0.397332029 | 8.00E-03 |
| VCAN-AS1 | VCAN antisense RNA 1                             | <a href="#">100873929</a> | 0.622814613 | 8.15E-03 |
| SMAD9    | SMAD family member 9                             | <a href="#">4093</a>      | 2.385287226 | 8.17E-03 |
| CLCN2    | chloride channel, voltage-sensitive 2            | <a href="#">1181</a>      | 1.774373716 | 8.26E-03 |
| HEG1     | HEG homolog 1 (zebrafish)                        | <a href="#">57493</a>     | 0.545941207 | 8.26E-03 |
| RGMB-AS1 | RGMB antisense RNA 1                             | <a href="#">503569</a>    | 2.10757212  | 8.31E-03 |
| BMPER    | BMP binding endothelial regulator                | <a href="#">168667</a>    | 0.610655703 | 8.51E-03 |
| CA12     | carbonic anhydrase XII                           | <a href="#">771</a>       | 3.915210838 | 8.61E-03 |
| FMN2     | formin 2                                         | <a href="#">56776</a>     | 3.260635107 | 8.61E-03 |
| RRM2     | ribonucleotide reductase M2                      | <a href="#">6241</a>      | 2.311574724 | 8.76E-03 |
| GALNT15  | polypeptide N-acetylgalactosaminyltransferase 15 | <a href="#">117248</a>    | 2.410728197 | 8.76E-03 |
| RASA3    | RAS p21 protein activator 3                      | <a href="#">22821</a>     | 1.482903071 | 8.89E-03 |
| BCAP29   | B-cell receptor-associated protein 29            | <a href="#">55973</a>     | 1.541673436 | 8.91E-03 |
| AMT      | aminomethyltransferase                           | <a href="#">275</a>       | 0.609523183 | 8.91E-03 |
| ACY1     | aminoacylase 1                                   | <a href="#">95</a>        | 0.630591094 | 8.96E-03 |
| TRIM22   | tripartite motif containing 22                   | <a href="#">10346</a>     | 0.525178223 | 8.96E-03 |

## Supplementary Table 1

|          |                                                                        |                           |             |          |
|----------|------------------------------------------------------------------------|---------------------------|-------------|----------|
| PRELID2  | PRELI domain containing 2                                              | <a href="#">153768</a>    | 2.129484162 | 9.10E-03 |
| SPRY4    | sprouty homolog 4 (Drosophila)                                         | <a href="#">81848</a>     | 3.032767707 | 9.31E-03 |
| ARHGEF39 | Rho guanine nucleotide exchange factor (GEF) 39                        | <a href="#">84904</a>     | 2.351882525 | 9.31E-03 |
| ARSJ     | arylsulfatase family, member J                                         | <a href="#">79642</a>     | 1.658989091 | 9.45E-03 |
| SLC25A36 | solute carrier family 25 (pyrimidine nucleotide carrier ), member 36   | <a href="#">55186</a>     | 1.465610049 | 9.56E-03 |
| GPX4     | glutathione peroxidase 4                                               | <a href="#">2879</a>      | 0.606425532 | 9.56E-03 |
| HSPA8P16 | heat shock 70kDa protein 8 pseudogene 16                               | <a href="#">100289643</a> | 0.115560479 | 9.64E-03 |
| POLE     | polymerase (DNA directed), epsilon, catalytic subunit                  | <a href="#">5426</a>      | 1.840325169 | 9.71E-03 |
| ADM2     | adrenomedullin 2                                                       | <a href="#">79924</a>     | 0.392178676 | 9.95E-03 |
| PPARG    | peroxisome proliferator-activated receptor gamma                       | <a href="#">5468</a>      | 0.347523634 | 9.95E-03 |
| NTM      | neurotrimin                                                            | <a href="#">50863</a>     | 2.377837293 | 1.00E-02 |
| APOL6    | apolipoprotein L, 6                                                    | <a href="#">80830</a>     | 0.491215163 | 1.00E-02 |
| ADH1B    | alcohol dehydrogenase 1B (class I), beta polypeptide                   | <a href="#">125</a>       | 0.051036351 | 1.01E-02 |
| PDCD1LG2 | programmed cell death 1 ligand 2                                       | <a href="#">80380</a>     | 3.627958618 | 1.02E-02 |
| MFAP5    | microfibrillar associated protein 5                                    | <a href="#">8076</a>      | 0.420190369 | 1.02E-02 |
| VPS53    | vacuolar protein sorting 53 homolog (S. cerevisiae)                    | <a href="#">55275</a>     | 3.950597864 | 1.03E-02 |
| MT-ND1   | mitochondrially encoded NADH dehydrogenase 1                           | <a href="#">4535</a>      | 0.436133888 | 1.04E-02 |
| ID3      | inhibitor of DNA binding 3, dominant negative helix-loop-helix protein | <a href="#">3399</a>      | 2.844557019 | 1.05E-02 |
| CHP1     | calcineurin-like EF hand protein 1                                     | <a href="#">11261</a>     | 0.668871417 | 1.05E-02 |
| ADAMTS15 | ADAM metallopeptidase with thrombospondin type 1 motif, 15             | <a href="#">170689</a>    | 0.172386894 | 1.05E-02 |



## Supplementary Table 1

|            |                                                            |                           |             |          |
|------------|------------------------------------------------------------|---------------------------|-------------|----------|
| CYP1B1-AS1 | CYP1B1 antisense RNA 1                                     | <a href="#">285154</a>    | 0.093158227 | 1.05E-02 |
| RAB11B-AS1 | RAB11B antisense RNA 1                                     | <a href="#">100507567</a> | 2.809775764 | 1.05E-02 |
| PITPNM3    | PITPNM family member 3                                     | <a href="#">83394</a>     | 2.245466191 | 1.05E-02 |
| NBPF2P     | neuroblastoma breakpoint family, member 2, pseudogene      | <a href="#">343381</a>    | 0.53101941  | 1.06E-02 |
| METRNL     | meteorin, glial cell differentiation regulator-like        | <a href="#">284207</a>    | 2.25027762  | 1.07E-02 |
| RNU7-75P   | RNA, U7 small nuclear 75 pseudogene                        | <a href="#">100151672</a> | 1.659401965 | 1.08E-02 |
| UGDH       | UDP-glucose 6-dehydrogenase                                | <a href="#">7358</a>      | 0.6577146   | 1.08E-02 |
| ENOX1      | ecto-NOX disulfide-thiol exchanger 1                       | <a href="#">55068</a>     | 0.511593096 | 1.08E-02 |
| PTCHD3P1   | patched domain containing 3 pseudogene 1                   | <a href="#">387647</a>    | 0.256363895 | 1.09E-02 |
| SEPT5      | septin 5                                                   | <a href="#">5413</a>      | 1.92690347  | 1.10E-02 |
| MCTP1      | multiple C2 domains, transmembrane 1                       | <a href="#">79772</a>     | 1.732201785 | 1.13E-02 |
| APOL3      | apolipoprotein L, 3                                        | <a href="#">80833</a>     | 0.290403551 | 1.16E-02 |
| CCNH       | cyclin H                                                   | <a href="#">902</a>       | 1.599185504 | 1.19E-02 |
| BCL7A      | B-cell CLL/lymphoma 7A                                     | <a href="#">605</a>       | 1.551008508 | 1.20E-02 |
| MESDC2     | mesoderm development candidate 2                           | <a href="#">23184</a>     | 0.474456919 | 1.21E-02 |
| PDGFRA     | platelet-derived growth factor receptor, alpha polypeptide | <a href="#">5156</a>      | 0.421325167 | 1.21E-02 |
| SLC43A2    | solute carrier family 43, member 2                         | <a href="#">124935</a>    | 0.317814092 | 1.22E-02 |
| DAPK1      | death-associated protein kinase 1                          | <a href="#">1612</a>      | 0.216355695 | 1.22E-02 |
| RAD51-AS1  | RAD51 antisense RNA 1 (head to head)                       | <a href="#">100505648</a> | 1.914021055 | 1.23E-02 |
| SAP30      | Sin3A-associated protein, 30kDa                            | <a href="#">8819</a>      | 0.377219981 | 1.23E-02 |

## Supplementary Table 1

|            |                                                                                                 |                        |             |          |
|------------|-------------------------------------------------------------------------------------------------|------------------------|-------------|----------|
| NDRG1      | N-myc downstream regulated 1                                                                    | <a href="#">10397</a>  | 1.650946649 | 1.25E-02 |
| ELFN1      | extracellular leucine-rich repeat and fibronectin type III domain containing 1                  | <a href="#">392617</a> | 0.196489347 | 1.28E-02 |
| ALK        | anaplastic lymphoma receptor tyrosine kinase                                                    | <a href="#">238</a>    | 2.86221094  | 1.31E-02 |
| TBX3       | T-box 3                                                                                         | <a href="#">6926</a>   | 1.873069589 | 1.34E-02 |
| C9orf139   | chromosome 9 open reading frame 139                                                             | <a href="#">401563</a> | 1.659507558 | 1.35E-02 |
| TRIM69     | tripartite motif containing 69                                                                  | <a href="#">140691</a> | 0.596793613 | 1.35E-02 |
| NCKAP5     | NCK-associated protein 5                                                                        | <a href="#">344148</a> | 0.237637101 | 1.36E-02 |
| ZNF295-AS1 | ZNF295 antisense RNA 1                                                                          | <a href="#">150142</a> | 1.713431362 | 1.36E-02 |
| UAP1L1     | UDP-N-acetylglucosamine pyrophosphorylase 1-like 1                                              | <a href="#">91373</a>  | 1.896463362 | 1.38E-02 |
| MEF2D      | myocyte enhancer factor 2D                                                                      | <a href="#">4209</a>   | 1.502827686 | 1.38E-02 |
| INHBA      | inhibin, beta A                                                                                 | <a href="#">3624</a>   | 3.721187279 | 1.39E-02 |
| PLAUR      | plasminogen activator, urokinase receptor                                                       | <a href="#">5329</a>   | 1.88038138  | 1.39E-02 |
| C14orf79   | chromosome 14 open reading frame 79                                                             | <a href="#">122616</a> | 1.868341528 | 1.41E-02 |
| IL17RD     | interleukin 17 receptor D                                                                       | <a href="#">54756</a>  | 0.484478987 | 1.42E-02 |
| ADH5       | alcohol dehydrogenase 5 (class III), chi polypeptide                                            | <a href="#">128</a>    | 0.602292542 | 1.42E-02 |
| AGPAT5     | 1-acylglycerol-3-phosphate O-acyltransferase 5 (lysophosphatidic acid acyltransferase, epsilon) | <a href="#">55326</a>  | 1.87157894  | 1.44E-02 |
| TMEM201    | transmembrane protein 201                                                                       | <a href="#">199953</a> | 1.919128215 | 1.48E-02 |
| ZNF773     | zinc finger protein 773                                                                         | <a href="#">374928</a> | 0.509908891 | 1.49E-02 |
| CENPI      | centromere protein I                                                                            | <a href="#">2491</a>   | 1.986854464 | 1.50E-02 |

## Supplementary Table 1

|          |                                                     |                           |             |          |
|----------|-----------------------------------------------------|---------------------------|-------------|----------|
| COL25A1  | collagen, type XXV, alpha 1                         | <a href="#">84570</a>     | 4.81259827  | 1.52E-02 |
| TNFAIP6  | tumor necrosis factor, alpha-induced protein 6      | <a href="#">7130</a>      | 0.642596666 | 1.52E-02 |
| LBH      | limb bud and heart development homolog (mouse)      | <a href="#">81606</a>     | 2.298792106 | 1.53E-02 |
| HCAR1    | hydroxycarboxylic acid receptor 1                   | <a href="#">27198</a>     | 1.743197098 | 1.53E-02 |
| TACR2    | tachykinin receptor 2                               | <a href="#">6865</a>      | 1.52504192  | 1.53E-02 |
| BTN3A3   | butyrophilin, subfamily 3, member A3                | <a href="#">10384</a>     | 0.543680353 | 1.54E-02 |
| IQCK     | IQ motif containing K                               | <a href="#">124152</a>    | 0.137836129 | 1.54E-02 |
| PTMAP2   | prothymosin, alpha pseudogene 2 (gene sequence 32)  | <a href="#">5759</a>      | 1.543418389 | 1.54E-02 |
| RARG     | retinoic acid receptor, gamma                       | <a href="#">5916</a>      | 0.560176357 | 1.55E-02 |
| DCN      | decorin                                             | <a href="#">1634</a>      | 0.398058948 | 1.55E-02 |
| EDA2R    | ectodysplasin A2 receptor                           | <a href="#">60401</a>     | 0.610792309 | 1.55E-02 |
| RPL21P28 | ribosomal protein L21 pseudogene 28                 | <a href="#">100131205</a> | 2.147450683 | 1.56E-02 |
| NLRP10   | NLR family, pyrin domain containing 10              | <a href="#">338322</a>    | 3.393551718 | 1.56E-02 |
| CDH4     | cadherin 4, type 1, R-cadherin (retinal)            | <a href="#">1002</a>      | 1.906601452 | 1.56E-02 |
| LPAR1    | lysophosphatidic acid receptor 1                    | <a href="#">1902</a>      | 0.672145186 | 1.57E-02 |
| DAAM1    | dishevelled associated activator of morphogenesis 1 | <a href="#">23002</a>     | 0.51923459  | 1.58E-02 |
| SPATA18  | spermatogenesis associated 18                       | <a href="#">132671</a>    | 0.449758982 | 1.58E-02 |
| FYN      | FYN oncogene related to SRC, FGR, YES               | <a href="#">2534</a>      | 0.597974181 | 1.58E-02 |
| RGS5     | regulator of G-protein signaling 5                  | <a href="#">8490</a>      | 1.81519583  | 1.59E-02 |
| SMC3     | structural maintenance of chromosomes 3             | <a href="#">9126</a>      | 1.483944052 | 1.59E-02 |

## Supplementary Table 1

|             |                                                                                                      |                           |             |          |
|-------------|------------------------------------------------------------------------------------------------------|---------------------------|-------------|----------|
| TUBGCP5     | tubulin, gamma complex associated protein 5                                                          | <a href="#">114791</a>    | 1.564861852 | 1.60E-02 |
| MLX         | MAX-like protein X                                                                                   | <a href="#">6945</a>      | 2.008942122 | 1.60E-02 |
| ARHGAP18    | Rho GTPase activating protein 18                                                                     | <a href="#">93663</a>     | 1.906576078 | 1.60E-02 |
| SYN2        | synapsin II                                                                                          | <a href="#">6854</a>      | 0.325171788 | 1.60E-02 |
| PLA2G4A     | phospholipase A2, group IVA (cytosolic, calcium-dependent)                                           | <a href="#">5321</a>      | 0.544920964 | 1.63E-02 |
| FTCD        | formiminotransferase cyclodeaminase                                                                  | <a href="#">10841</a>     | 2.188673874 | 1.64E-02 |
| PLK4        | polo-like kinase 4                                                                                   | <a href="#">10733</a>     | 1.825563055 | 1.64E-02 |
| AMMECR1     | Alport syndrome, mental retardation, midface hypoplasia and elliptocytosis chromosomal region gene 1 | <a href="#">9949</a>      | 0.690587583 | 1.64E-02 |
| ENPP1       | ectonucleotide pyrophosphatase/phosphodiesterase 1                                                   | <a href="#">5167</a>      | 2.249895508 | 1.65E-02 |
| QSOX2       | quiescin Q6 sulfhydryl oxidase 2                                                                     | <a href="#">169714</a>    | 1.621315321 | 1.65E-02 |
| BBIP1       | BBSome interacting protein 1                                                                         | <a href="#">92482</a>     | 0.616871842 | 1.65E-02 |
| CFI         | complement factor I                                                                                  | <a href="#">3426</a>      | 0.284872053 | 1.67E-02 |
| NUPR1       | nuclear protein, transcriptional regulator, 1                                                        | <a href="#">26471</a>     | 0.523559824 | 1.68E-02 |
| DENND5B-AS1 | DENND5B antisense RNA 1                                                                              | <a href="#">100874249</a> | 2.931520204 | 1.68E-02 |
| TNK2        | tyrosine kinase, non-receptor, 2                                                                     | <a href="#">10188</a>     | 1.860361256 | 1.68E-02 |
| CERK        | ceramide kinase                                                                                      | <a href="#">64781</a>     | 1.626713519 | 1.68E-02 |
| SLC44A1     | solute carrier family 44, member 1                                                                   | <a href="#">23446</a>     | 0.602007222 | 1.68E-02 |
| RNF41       | ring finger protein 41                                                                               | <a href="#">10193</a>     | 0.623019101 | 1.69E-02 |
| COL11A1     | collagen, type XI, alpha 1                                                                           | <a href="#">1301</a>      | 3.355216823 | 1.70E-02 |

## Supplementary Table 1

|            |                                                                                   |                           |             |          |
|------------|-----------------------------------------------------------------------------------|---------------------------|-------------|----------|
| PLEKHG3    | pleckstrin homology domain containing, family G (with RhoGef domain) member 3     | <a href="#">26030</a>     | 2.70128339  | 1.71E-02 |
| KIF18B     | kinesin family member 18B                                                         | <a href="#">146909</a>    | 1.943861189 | 1.71E-02 |
| SLC25A11   | solute carrier family 25 (mitochondrial carrier; oxoglutarate carrier), member 11 | <a href="#">8402</a>      | 0.647382557 | 1.71E-02 |
| CSGALNACT1 | chondroitin sulfate N-acetylgalactosaminyltransferase 1                           | <a href="#">55790</a>     | 0.511961597 | 1.73E-02 |
| FBXO11     | F-box protein 11                                                                  | <a href="#">80204</a>     | 1.530439591 | 1.73E-02 |
| ZFP37      | zinc finger protein 37 homolog (mouse)                                            | <a href="#">7539</a>      | 0.539798323 | 1.74E-02 |
| HHIP-AS1   | HHIP antisense RNA 1                                                              | <a href="#">646576</a>    | 5.193891944 | 1.78E-02 |
| KIAA2013   | KIAA2013                                                                          | <a href="#">90231</a>     | 1.560059874 | 1.80E-02 |
| MKL2       | MKL/myocardin-like 2                                                              | <a href="#">57496</a>     | 1.613574735 | 1.80E-02 |
| MIR4253    | microRNA 4253                                                                     | <a href="#">100422914</a> | 0.349065336 | 1.81E-02 |
| GSR        | glutathione reductase                                                             | <a href="#">2936</a>      | 0.665768815 | 1.83E-02 |
| MYO10      | myosin X                                                                          | <a href="#">4651</a>      | 2.037032503 | 1.84E-02 |
| FASTK      | Fas-activated serine/threonine kinase                                             | <a href="#">10922</a>     | 1.492538245 | 1.84E-02 |
| GAB2       | GRB2-associated binding protein 2                                                 | <a href="#">9846</a>      | 0.611256921 | 1.85E-02 |
| KLHL17     | kelch-like 17 (Drosophila)                                                        | <a href="#">339451</a>    | 1.853812843 | 1.87E-02 |
| C14orf132  | chromosome 14 open reading frame 132                                              | <a href="#">56967</a>     | 1.745284947 | 1.89E-02 |
| FTL        | ferritin, light polypeptide                                                       | <a href="#">2512</a>      | 0.650879463 | 1.89E-02 |
| SH2D4A     | SH2 domain containing 4A                                                          | <a href="#">63898</a>     | 0.510692968 | 1.90E-02 |
| MCM3       | minichromosome maintenance complex component 3                                    | <a href="#">4172</a>      | 1.789128612 | 1.91E-02 |
| AOX1       | aldehyde oxidase 1                                                                | <a href="#">316</a>       | 0.525431755 | 1.91E-02 |

## Supplementary Table 1

|           |                                                       |                           |             |          |
|-----------|-------------------------------------------------------|---------------------------|-------------|----------|
| C11orf95  | chromosome 11 open reading frame 95                   | <a href="#">65998</a>     | 0.688210257 | 1.94E-02 |
| AURKB     | aurora kinase B                                       | <a href="#">9212</a>      | 1.884699479 | 1.95E-02 |
| C1orf213  | chromosome 1 open reading frame 213                   | <a href="#">148898</a>    | 0.50953318  | 1.95E-02 |
| GTPBP6    | GTP binding protein 6 (putative)                      | <a href="#">8225</a>      | 2.027042026 | 1.95E-02 |
| ZNF671    | zinc finger protein 671                               | <a href="#">79891</a>     | 0.422731639 | 1.95E-02 |
| ACSS1     | acyl-CoA synthetase short-chain family member 1       | <a href="#">84532</a>     | 0.335761333 | 1.97E-02 |
| STMN1     | stathmin 1                                            | <a href="#">3925</a>      | 1.6413253   | 1.99E-02 |
| RBBP8P1   | retinoblastoma binding protein 8 pseudogene 1         | <a href="#">100420552</a> | 0.559230829 | 2.00E-02 |
| CDK5R1    | cyclin-dependent kinase 5, regulatory subunit 1 (p35) | <a href="#">8851</a>      | 2.777654192 | 2.01E-02 |
| LRP12     | low density lipoprotein receptor-related protein 12   | <a href="#">29967</a>     | 1.721773538 | 2.01E-02 |
| PDCD4-AS1 | PDCD4 antisense RNA 1                                 | <a href="#">282997</a>    | 0.601079241 | 2.01E-02 |
| APRT      | adenine phosphoribosyltransferase                     | <a href="#">353</a>       | 2.449154863 | 2.02E-02 |
| GPAM      | glycerol-3-phosphate acyltransferase, mitochondrial   | <a href="#">57678</a>     | 3.376374656 | 2.05E-02 |
| DUSP3     | dual specificity phosphatase 3                        | <a href="#">1845</a>      | 1.718240878 | 2.06E-02 |
| IDE       | insulin-degrading enzyme                              | <a href="#">3416</a>      | 0.707713576 | 2.07E-02 |
| PALM      | paralemmin                                            | <a href="#">5064</a>      | 0.187614339 | 2.07E-02 |
| PDLIM3    | PDZ and LIM domain 3                                  | <a href="#">27295</a>     | 4.630185521 | 2.07E-02 |
| RHBDF2    | rhomboid 5 homolog 2 (Drosophila)                     | <a href="#">79651</a>     | 5.353108892 | 2.07E-02 |
| GPR157    | G protein-coupled receptor 157                        | <a href="#">80045</a>     | 1.956984596 | 2.07E-02 |
| NCOA2     | nuclear receptor coactivator 2                        | <a href="#">10499</a>     | 0.652629995 | 2.07E-02 |

## Supplementary Table 1

|         |                                                                            |                           |             |          |
|---------|----------------------------------------------------------------------------|---------------------------|-------------|----------|
| ZNF276  | zinc finger protein 276                                                    | <a href="#">92822</a>     | 1.795122254 | 2.07E-02 |
| GSTK1   | glutathione S-transferase kappa 1                                          | <a href="#">373156</a>    | 0.709746975 | 2.09E-02 |
| TMEM154 | transmembrane protein 154                                                  | <a href="#">201799</a>    | 1.818751326 | 2.14E-02 |
| DSN1    | DSN1, MIND kinetochore complex component, homolog ( <i>S. cerevisiae</i> ) | <a href="#">79980</a>     | 1.706138541 | 2.14E-02 |
| ERF     | Ets2 repressor factor                                                      | <a href="#">2077</a>      | 1.679568225 | 2.14E-02 |
| NAMPT   | nicotinamide phosphoribosyltransferase                                     | <a href="#">10135</a>     | 1.497198492 | 2.14E-02 |
| SVEP1   | sushi, von Willebrand factor type A, EGF and pentraxin domain containing 1 | <a href="#">79987</a>     | 0.247102926 | 2.15E-02 |
| LOX     | lysyl oxidase                                                              | <a href="#">4015</a>      | 0.466916022 | 2.16E-02 |
| RFWD3   | ring finger and WD repeat domain 3                                         | <a href="#">55159</a>     | 1.688632516 | 2.18E-02 |
| ZNF575  | zinc finger protein 575                                                    | <a href="#">284346</a>    | 0.588936625 | 2.18E-02 |
| YME1L1  | YME1-like 1 ( <i>S. cerevisiae</i> )                                       | <a href="#">10730</a>     | 1.465257173 | 2.19E-02 |
| EIF4BP5 | eukaryotic translation initiation factor 4B pseudogene 5                   | <a href="#">100421528</a> | 0.690034883 | 2.20E-02 |
| TDP1    | tyrosyl-DNA phosphodiesterase 1                                            | <a href="#">55775</a>     | 1.720661967 | 2.22E-02 |
| KCNAB3  | potassium voltage-gated channel, shaker-related subfamily, beta member 3   | <a href="#">9196</a>      | 1.426151849 | 2.22E-02 |
| GSTO2   | glutathione S-transferase omega 2                                          | <a href="#">119391</a>    | 2.378508202 | 2.24E-02 |
| POLD1   | polymerase (DNA directed), delta 1, catalytic subunit                      | <a href="#">5424</a>      | 2.033986354 | 2.24E-02 |
| ZNF181  | zinc finger protein 181                                                    | <a href="#">339318</a>    | 0.588339621 | 2.24E-02 |
| YWHAQP6 | YWHAQ pseudogene 6                                                         | <a href="#">100499253</a> | 1.611803644 | 2.24E-02 |
| GINS3   | GINS complex subunit 3 (Psf3 homolog)                                      | <a href="#">64785</a>     | 1.950961218 | 2.24E-02 |
| THBS1   | thrombospondin 1                                                           | <a href="#">7057</a>      | 1.695654686 | 2.24E-02 |

## Supplementary Table 1

|            |                                                                                                               |                           |             |          |
|------------|---------------------------------------------------------------------------------------------------------------|---------------------------|-------------|----------|
| ANGPTL4    | angiopoietin-like 4                                                                                           | <a href="#">51129</a>     | 3.778718376 | 2.25E-02 |
| ST6GALNAC5 | ST6 (alpha-N-acetyl-neuraminyl-2,3-beta-galactosyl-1,3)-N-acetylgalactosaminide alpha-2,6-sialyltransferase 5 | <a href="#">81849</a>     | 4.897606959 | 2.26E-02 |
| SH3BP2     | SH3-domain binding protein 2                                                                                  | <a href="#">6452</a>      | 1.582941457 | 2.26E-02 |
| PUS7       | pseudouridylate synthase 7 homolog (S. cerevisiae)                                                            | <a href="#">54517</a>     | 1.476476608 | 2.26E-02 |
| RLF        | rearranged L-myc fusion                                                                                       | <a href="#">6018</a>      | 1.482795765 | 2.26E-02 |
| RNF141     | ring finger protein 141                                                                                       | <a href="#">50862</a>     | 2.139644331 | 2.26E-02 |
| CBX5       | chromobox homolog 5                                                                                           | <a href="#">23468</a>     | 1.508948847 | 2.27E-02 |
| KIAA0513   | KIAA0513                                                                                                      | <a href="#">9764</a>      | 0.545322807 | 2.27E-02 |
| TFP1       | transferrin pseudogene 1                                                                                      | <a href="#">100129696</a> | 1.597007845 | 2.27E-02 |
| EDARADD    | EDAR-associated death domain                                                                                  | <a href="#">128178</a>    | 1.996893927 | 2.30E-02 |
| UBA7       | ubiquitin-like modifier activating enzyme 7                                                                   | <a href="#">7318</a>      | 0.542236337 | 2.30E-02 |
| ATP5J2LP   | ATP synthase, H <sup>+</sup> transporting, mitochondrial Fo complex, subunit F2-like pseudogene               | <a href="#">54100</a>     | 1.864689087 | 2.30E-02 |
| MT-ND3     | mitochondrially encoded NADH dehydrogenase 3                                                                  | <a href="#">4537</a>      | 15.33685748 | 2.31E-02 |
| SCO2       | SCO cytochrome oxidase deficient homolog 2 (yeast)                                                            | <a href="#">9997</a>      | 1.72294948  | 2.31E-02 |
| CCDC82     | coiled-coil domain containing 82                                                                              | <a href="#">79780</a>     | 1.666947653 | 2.32E-02 |
| TOPBP1     | topoisomerase (DNA) II binding protein 1                                                                      | <a href="#">11073</a>     | 1.612363467 | 2.32E-02 |
| PLD5       | phospholipase D family, member 5                                                                              | <a href="#">200150</a>    | 12.63610565 | 2.34E-02 |
| ZSWIM4     | zinc finger, SWIM-type containing 4                                                                           | <a href="#">65249</a>     | 2.741881079 | 2.34E-02 |



## Supplementary Table 1

|             |                                                                                                     |                           |             |          |
|-------------|-----------------------------------------------------------------------------------------------------|---------------------------|-------------|----------|
| ZNF436      | zinc finger protein 436                                                                             | <a href="#">80818</a>     | 0.511575259 | 2.34E-02 |
| SIX2        | SIX homeobox 2                                                                                      | <a href="#">10736</a>     | 0.308996842 | 2.34E-02 |
| NMI         | N-myc (and STAT) interactor                                                                         | <a href="#">9111</a>      | 0.484483689 | 2.35E-02 |
| PKIG        | protein kinase (cAMP-dependent, catalytic) inhibitor gamma                                          | <a href="#">11142</a>     | 0.471679237 | 2.35E-02 |
| CSMD2       | CUB and Sushi multiple domains 2                                                                    | <a href="#">114784</a>    | 1.79451129  | 2.38E-02 |
| SERTAD4-AS1 | SERTAD4 antisense RNA 1                                                                             | <a href="#">574036</a>    | 0.312135207 | 2.38E-02 |
| COX6B1P5    | cytochrome c oxidase subunit VIb polypeptide 1 (ubiquitous) pseudogene 5                            | <a href="#">100289662</a> | 1.481256618 | 2.39E-02 |
| MEG9        | maternally expressed 9 (non-protein coding)                                                         | <a href="#">100507257</a> | 0.46647737  | 2.40E-02 |
| MRPS33P2    | mitochondrial ribosomal protein S33 pseudogene 2                                                    | <a href="#">359775</a>    | 1.785444638 | 2.41E-02 |
| SNX24       | sorting nexin 24                                                                                    | <a href="#">28966</a>     | 0.623942462 | 2.41E-02 |
| HSD17B4     | hydroxysteroid (17-beta) dehydrogenase 4                                                            | <a href="#">3295</a>      | 0.693220248 | 2.41E-02 |
| FAM227A     | family with sequence similarity 227, member A                                                       | <a href="#">646851</a>    | 0.686143529 | 2.41E-02 |
| CDC14B      | CDC14 cell division cycle 14 homolog B ( <i>S. cerevisiae</i> )                                     | <a href="#">8555</a>      | 0.657313718 | 2.41E-02 |
| LMLN-AS1    | LMLN antisense RNA 1                                                                                | <a href="#">100873947</a> | 1.504533156 | 2.41E-02 |
| PCBD1       | pterin-4 alpha-carbinolamine dehydratase/dimerization cofactor of hepatocyte nuclear factor 1 alpha | <a href="#">5092</a>      | 0.601179825 | 2.41E-02 |
| AEBP1       | AE binding protein 1                                                                                | <a href="#">165</a>       | 1.683122055 | 2.43E-02 |
| CHRNA1      | cholinergic receptor, nicotinic, alpha 1 (muscle)                                                   | <a href="#">1134</a>      | 10.96639926 | 2.45E-02 |
| STAT2       | signal transducer and activator of transcription 2, 113kDa                                          | <a href="#">6773</a>      | 0.618865499 | 2.46E-02 |
| LPHN2       | latrophilin 2                                                                                       | <a href="#">23266</a>     | 0.503785813 | 2.46E-02 |

## Supplementary Table 1

|         |                                                                  |                        |             |          |
|---------|------------------------------------------------------------------|------------------------|-------------|----------|
| PCSK7   | proprotein convertase subtilisin/kexin type 7                    | <a href="#">9159</a>   | 1.900422773 | 2.47E-02 |
| ASPA    | aspartoacylase                                                   | <a href="#">443</a>    | 0.194680731 | 2.53E-02 |
| ARSI    | arylsulfatase family, member I                                   | <a href="#">340075</a> | 2.179599402 | 2.57E-02 |
| TLE3    | transducin-like enhancer of split 3 (E(sp1) homolog, Drosophila) | <a href="#">7090</a>   | 1.494636646 | 2.58E-02 |
| DUSP10  | dual specificity phosphatase 10                                  | <a href="#">11221</a>  | 2.164894919 | 2.59E-02 |
| UBALD2  | UBA-like domain containing 2                                     | <a href="#">283991</a> | 1.811497105 | 2.60E-02 |
| DOK5    | docking protein 5                                                | <a href="#">55816</a>  | 1.658857545 | 2.61E-02 |
| BTN3A1  | butyrophilin, subfamily 3, member A1                             | <a href="#">11119</a>  | 0.555340762 | 2.63E-02 |
| COL6A2  | collagen, type VI, alpha 2                                       | <a href="#">1292</a>   | 2.131980141 | 2.64E-02 |
| DZIP3   | DAZ interacting protein 3, zinc finger                           | <a href="#">9666</a>   | 1.770005692 | 2.66E-02 |
| PPIL2   | peptidylprolyl isomerase (cyclophilin)-like 2                    | <a href="#">23759</a>  | 3.632568492 | 2.66E-02 |
| SF3A3P2 | splicing factor 3a, subunit 3 pseudogene 2                       | <a href="#">449645</a> | 2.8601702   | 2.66E-02 |
| TIAM1   | T-cell lymphoma invasion and metastasis 1                        | <a href="#">7074</a>   | 0.665181938 | 2.66E-02 |
| RGAG4   | retrotransposon gag domain containing 4                          | <a href="#">340526</a> | 0.603034522 | 2.66E-02 |
| GAS7    | growth arrest-specific 7                                         | <a href="#">8522</a>   | 0.549641484 | 2.66E-02 |
| POLR2J4 | polymerase (RNA) II (DNA directed) polypeptide J4, pseudogene    | <a href="#">84820</a>  | 0.548679318 | 2.66E-02 |
| USP53   | ubiquitin specific peptidase 53                                  | <a href="#">54532</a>  | 0.508074443 | 2.66E-02 |
| SPRED2  | sprouty-related, EVH1 domain containing 2                        | <a href="#">200734</a> | 0.677052682 | 2.66E-02 |
| LIPG    | lipase, endothelial                                              | <a href="#">9388</a>   | 0.255588176 | 2.67E-02 |
| UPP1    | uridine phosphorylase 1                                          | <a href="#">7378</a>   | 1.707338952 | 2.68E-02 |

## Supplementary Table 1

|                |                                                                     |                           |             |          |
|----------------|---------------------------------------------------------------------|---------------------------|-------------|----------|
| IMPDH1         | IMP (inosine 5'-monophosphate) dehydrogenase 1                      | <a href="#">3614</a>      | 1.517116737 | 2.68E-02 |
| AHCTF1         | AT hook containing transcription factor 1                           | <a href="#">25909</a>     | 1.444301061 | 2.68E-02 |
| CSRP1          | cysteine and glycine-rich protein 1                                 | <a href="#">1465</a>      | 1.785116091 | 2.68E-02 |
| PCSK9          | proprotein convertase subtilisin/kexin type 9                       | <a href="#">255738</a>    | 0.164963071 | 2.69E-02 |
| CYB561         | cytochrome b-561                                                    | <a href="#">1534</a>      | 0.638594087 | 2.69E-02 |
| PTPN12         | protein tyrosine phosphatase, non-receptor type 12                  | <a href="#">5782</a>      | 1.459985357 | 2.69E-02 |
| EPHB1          | EPH receptor B1                                                     | <a href="#">2047</a>      | 3.693913287 | 2.76E-02 |
| PRKDC          | protein kinase, DNA-activated, catalytic polypeptide                | <a href="#">5591</a>      | 1.719063575 | 2.76E-02 |
| SNX18          | sorting nexin 18                                                    | <a href="#">112574</a>    | 0.626941658 | 2.76E-02 |
| JAG1           | jagged 1                                                            | <a href="#">182</a>       | 0.228252569 | 2.76E-02 |
| KREMEN2        | kringle containing transmembrane protein 2                          | <a href="#">79412</a>     | 2.60341806  | 2.76E-02 |
| PAM            | peptidylglycine alpha-amidating monooxygenase                       | <a href="#">5066</a>      | 1.486674179 | 2.79E-02 |
| BLOC1S5-TXNDC5 | BLOC1S5-TXNDC5 readthrough (non-protein coding)                     | <a href="#">100526836</a> | 0.247759623 | 2.80E-02 |
| DFNA5          | deafness, autosomal dominant 5                                      | <a href="#">1687</a>      | 0.593006408 | 2.82E-02 |
| PTPRE          | protein tyrosine phosphatase, receptor type, E                      | <a href="#">5791</a>      | 2.469067025 | 2.84E-02 |
| IL17RA         | interleukin 17 receptor A                                           | <a href="#">23765</a>     | 1.623641252 | 2.84E-02 |
| APOBEC3C       | apolipoprotein B mRNA editing enzyme, catalytic polypeptide-like 3C | <a href="#">27350</a>     | 0.679739563 | 2.84E-02 |
| OXTR           | oxytocin receptor                                                   | <a href="#">5021</a>      | 5.371700987 | 2.86E-02 |
| HAUS5          | HAUS augmin-like complex, subunit 5                                 | <a href="#">23354</a>     | 1.645308251 | 2.86E-02 |

## Supplementary Table 1

|           |                                                           |                           |             |          |
|-----------|-----------------------------------------------------------|---------------------------|-------------|----------|
| C5orf45   | chromosome 5 open reading frame 45                        | <a href="#">51149</a>     | 0.70369248  | 2.86E-02 |
| TNFRSF10B | tumor necrosis factor receptor superfamily, member 10b    | <a href="#">8795</a>      | 1.510525354 | 2.87E-02 |
| GMNN      | geminin, DNA replication inhibitor                        | <a href="#">51053</a>     | 1.829284414 | 2.88E-02 |
| SNORA51   | small nucleolar RNA, H/ACA box 51                         | <a href="#">677831</a>    | 0.671930676 | 2.88E-02 |
| ZNF66     | zinc finger protein 66                                    | <a href="#">7617</a>      | 2.141616263 | 2.88E-02 |
| AGAP1     | ArfGAP with GTPase domain, ankyrin repeat and PH domain 1 | <a href="#">116987</a>    | 1.614060213 | 2.88E-02 |
| NNT-AS1   | NNT antisense RNA 1                                       | <a href="#">100652772</a> | 0.66943496  | 2.88E-02 |
| ITM2B     | integral membrane protein 2B                              | <a href="#">9445</a>      | 0.678425264 | 2.89E-02 |
| NR4A3     | nuclear receptor subfamily 4, group A, member 3           | <a href="#">8013</a>      | 4.285899439 | 2.90E-02 |
| NBR1      | neighbor of BRCA1 gene 1                                  | <a href="#">4077</a>      | 0.692657999 | 2.92E-02 |
| CARD9     | caspase recruitment domain family, member 9               | <a href="#">64170</a>     | 1.822710832 | 2.92E-02 |
| PDE4B     | phosphodiesterase 4B, cAMP-specific                       | <a href="#">5142</a>      | 3.269624593 | 3.00E-02 |
| MCAM      | melanoma cell adhesion molecule                           | <a href="#">4162</a>      | 4.367473653 | 3.02E-02 |
| FLG-AS1   | FLG antisense RNA 1                                       | <a href="#">339400</a>    | 0.1149781   | 3.02E-02 |
| KIF20B    | kinesin family member 20B                                 | <a href="#">9585</a>      | 1.71872985  | 3.03E-02 |
| DAW1      | dynein assembly factor with WDR repeat domains 1          | <a href="#">164781</a>    | 7.450317974 | 3.04E-02 |
| RASSF1    | Ras association (RalGDS/AF-6) domain family member 1      | <a href="#">11186</a>     | 1.461719816 | 3.04E-02 |
| CIC       | capicua homolog (Drosophila)                              | <a href="#">23152</a>     | 1.675011267 | 3.05E-02 |
| TSPAN13   | tetraspanin 13                                            | <a href="#">27075</a>     | 3.160524503 | 3.08E-02 |
| DDX39A    | DEAD (Asp-Glu-Ala-Asp) box polypeptide 39A                | <a href="#">10212</a>     | 1.783007535 | 3.08E-02 |

## Supplementary Table 1

|           |                                                                             |                           |             |          |
|-----------|-----------------------------------------------------------------------------|---------------------------|-------------|----------|
| TBC1D16   | TBC1 domain family, member 16                                               | <a href="#">125058</a>    | 0.719251086 | 3.08E-02 |
| KLF4      | Kruppel-like factor 4 (gut)                                                 | <a href="#">9314</a>      | 0.399699868 | 3.08E-02 |
| METTL7A   | methyltransferase like 7A                                                   | <a href="#">25840</a>     | 0.363898245 | 3.08E-02 |
| IDH2      | isocitrate dehydrogenase 2 (NADP+), mitochondrial                           | <a href="#">3418</a>      | 1.50288373  | 3.09E-02 |
| MIR5683   | microRNA 5683                                                               | <a href="#">100847034</a> | 5.293070978 | 3.10E-02 |
| DNTTIP1   | deoxynucleotidyltransferase, terminal, interacting protein 1                | <a href="#">116092</a>    | 1.671970624 | 3.10E-02 |
| FOXK2     | forkhead box K2                                                             | <a href="#">3607</a>      | 1.415951451 | 3.10E-02 |
| FTLP3     | ferritin, light polypeptide pseudogene 3                                    | <a href="#">284764</a>    | 0.667895269 | 3.10E-02 |
| CBFB      | core-binding factor, beta subunit                                           | <a href="#">865</a>       | 1.486398448 | 3.13E-02 |
| WDR76     | WD repeat domain 76                                                         | <a href="#">79968</a>     | 1.941094156 | 3.15E-02 |
| PROB1     | proline-rich basic protein 1                                                | <a href="#">389333</a>    | 4.340562452 | 3.19E-02 |
| WDR34     | WD repeat domain 34                                                         | <a href="#">89891</a>     | 0.685941763 | 3.24E-02 |
| TMEM258   | transmembrane protein 258                                                   | <a href="#">746</a>       | 1.836075648 | 3.25E-02 |
| KIAA0895  | KIAA0895                                                                    | <a href="#">23366</a>     | 1.788006399 | 3.25E-02 |
| RAD51AP1  | RAD51 associated protein 1                                                  | <a href="#">10635</a>     | 1.778660051 | 3.25E-02 |
| RNA5SP437 | RNA, 5S ribosomal pseudogene 437                                            | <a href="#">100873686</a> | 1.456971442 | 3.25E-02 |
| MT1L      | metallothionein 1L (gene/pseudogene)                                        | <a href="#">4500</a>      | 3.100235909 | 3.25E-02 |
| DTWD2     | DTW domain containing 2                                                     | <a href="#">285605</a>    | 1.512862006 | 3.27E-02 |
| HBEGF     | heparin-binding EGF-like growth factor                                      | <a href="#">1839</a>      | 3.743440957 | 3.30E-02 |
| SLC6A7    | solute carrier family 6 (neurotransmitter transporter, L-proline), member 7 | <a href="#">6534</a>      | 2.182559523 | 3.32E-02 |

## Supplementary Table 1

|          |                                                                                     |                        |             |          |
|----------|-------------------------------------------------------------------------------------|------------------------|-------------|----------|
| PHRF1    | PHD and ring finger domains 1                                                       | <a href="#">57661</a>  | 1.624637331 | 3.33E-02 |
| SPR      | sepiapterin reductase (7,8-dihydrobiopterin:NADP+ oxidoreductase)                   | <a href="#">6697</a>   | 0.524803592 | 3.33E-02 |
| PROCR    | protein C receptor, endothelial                                                     | <a href="#">10544</a>  | 0.661434682 | 3.34E-02 |
| SLC29A1  | solute carrier family 29 (nucleoside transporters), member 1                        | <a href="#">2030</a>   | 2.026485707 | 3.35E-02 |
| GPHA2    | glycoprotein hormone alpha 2                                                        | <a href="#">170589</a> | 1.520837805 | 3.37E-02 |
| SZT2     | seizure threshold 2 homolog (mouse)                                                 | <a href="#">23334</a>  | 1.824657517 | 3.38E-02 |
| SERPINA1 | serpin peptidase inhibitor, clade A (alpha-1 antiproteinase, antitrypsin), member 1 | <a href="#">5265</a>   | 9.893122904 | 3.44E-02 |
| ARHGEF3  | Rho guanine nucleotide exchange factor (GEF) 3                                      | <a href="#">50650</a>  | 0.479202387 | 3.44E-02 |
| GPR17    | G protein-coupled receptor 17                                                       | <a href="#">2840</a>   | 0.473743811 | 3.44E-02 |
| SMC2     | structural maintenance of chromosomes 2                                             | <a href="#">10592</a>  | 1.617235973 | 3.49E-02 |
| KIAA0930 | KIAA0930                                                                            | <a href="#">23313</a>  | 0.657241097 | 3.49E-02 |
| TSPAN2   | tetraspanin 2                                                                       | <a href="#">10100</a>  | 0.222466653 | 3.49E-02 |
| XRCC2    | X-ray repair complementing defective repair in Chinese hamster cells 2              | <a href="#">7516</a>   | 1.90658969  | 3.54E-02 |
| DBF4     | DBF4 homolog ( <i>S. cerevisiae</i> )                                               | <a href="#">10926</a>  | 1.480028749 | 3.57E-02 |
| ZMYND8   | zinc finger, MYND-type containing 8                                                 | <a href="#">23613</a>  | 1.432299601 | 3.57E-02 |
| LMF2     | lipase maturation factor 2                                                          | <a href="#">91289</a>  | 1.788438985 | 3.59E-02 |
| HELLS    | helicase, lymphoid-specific                                                         | <a href="#">3070</a>   | 1.768074787 | 3.59E-02 |
| PCDH18   | protocadherin 18                                                                    | <a href="#">54510</a>  | 0.538415445 | 3.59E-02 |
| ZHX2     | zinc fingers and homeoboxes 2                                                       | <a href="#">22882</a>  | 0.464723337 | 3.61E-02 |
| PLIN2    | perilipin 2                                                                         | <a href="#">123</a>    | 1.937997756 | 3.62E-02 |

## Supplementary Table 1

|          |                                                                    |                        |             |          |
|----------|--------------------------------------------------------------------|------------------------|-------------|----------|
| TRPC1    | transient receptor potential cation channel, subfamily C, member 1 | <a href="#">7220</a>   | 1.616901843 | 3.62E-02 |
| WDFY2    | WD repeat and FYVE domain containing 2                             | <a href="#">115825</a> | 1.47740821  | 3.62E-02 |
| SOCS5    | suppressor of cytokine signaling 5                                 | <a href="#">9655</a>   | 0.638625206 | 3.62E-02 |
| ZMAT3    | zinc finger, matrin-type 3                                         | <a href="#">64393</a>  | 0.635244155 | 3.62E-02 |
| MCC      | mutated in colorectal cancers                                      | <a href="#">4163</a>   | 0.601730254 | 3.62E-02 |
| OLFML2A  | olfactomedin-like 2A                                               | <a href="#">169611</a> | 0.363264175 | 3.62E-02 |
| CDKN2D   | cyclin-dependent kinase inhibitor 2D (p19, inhibits CDK4)          | <a href="#">1032</a>   | 2.029226632 | 3.63E-02 |
| KIAA1841 | KIAA1841                                                           | <a href="#">84542</a>  | 0.647760499 | 3.71E-02 |
| RAI14    | retinoic acid induced 14                                           | <a href="#">26064</a>  | 1.521785794 | 3.72E-02 |
| PFN1P10  | profilin 1 pseudogene 10                                           | <a href="#">767853</a> | 0.586606922 | 3.72E-02 |
| FSIP1    | fibrous sheath interacting protein 1                               | <a href="#">161835</a> | 1.654844548 | 3.74E-02 |
| ADAP2    | ArfGAP with dual PH domains 2                                      | <a href="#">55803</a>  | 0.692953572 | 3.74E-02 |
| STRIP2   | striatin interacting protein 2                                     | <a href="#">57464</a>  | 2.263377145 | 3.79E-02 |
| GRIP2    | glutamate receptor interacting protein 2                           | <a href="#">80852</a>  | 1.947295327 | 3.79E-02 |
| GTF2E1   | general transcription factor IIE, polypeptide 1, alpha 56kDa       | <a href="#">2960</a>   | 1.461375069 | 3.82E-02 |
| NT5DC4   | 5'-nucleotidase domain containing 4                                | <a href="#">284958</a> | 1.74635529  | 3.84E-02 |
| FAM73A   | family with sequence similarity 73, member A                       | <a href="#">374986</a> | 1.412732188 | 3.84E-02 |
| URGCP    | upregulator of cell proliferation                                  | <a href="#">55665</a>  | 0.614004443 | 3.84E-02 |
| EPS8     | epidermal growth factor receptor pathway substrate 8               | <a href="#">2059</a>   | 0.729792131 | 3.86E-02 |
| SNORA43  | small nucleolar RNA, H/ACA box 43                                  | <a href="#">677824</a> | 1.639702861 | 3.87E-02 |

## Supplementary Table 1

|            |                                                           |                           |             |          |
|------------|-----------------------------------------------------------|---------------------------|-------------|----------|
| MELK       | maternal embryonic leucine zipper kinase                  | <a href="#">9833</a>      | 1.769179708 | 3.89E-02 |
| TUFT1      | tuftelin 1                                                | <a href="#">7286</a>      | 0.466393957 | 3.89E-02 |
| MIR503HG   | MIR503 host gene                                          | <a href="#">84848</a>     | 0.493097553 | 3.91E-02 |
| PMP22      | peripheral myelin protein 22                              | <a href="#">5376</a>      | 0.588529403 | 3.93E-02 |
| ST7L       | suppression of tumorigenicity 7 like                      | <a href="#">54879</a>     | 0.518225783 | 3.93E-02 |
| CXCL5      | chemokine (C-X-C motif) ligand 5                          | <a href="#">6374</a>      | 4.277375905 | 3.93E-02 |
| IPMK       | inositol polyphosphate multikinase                        | <a href="#">253430</a>    | 1.551086238 | 3.93E-02 |
| PRKAR1A    | protein kinase, cAMP-dependent, regulatory, type I, alpha | <a href="#">5573</a>      | 0.375677079 | 3.95E-02 |
| LRRFIP1    | leucine rich repeat (in FLII) interacting protein 1       | <a href="#">9208</a>      | 1.594455131 | 3.97E-02 |
| CCNA2      | cyclin A2                                                 | <a href="#">890</a>       | 1.501554355 | 3.97E-02 |
| WNT5B      | wingless-type MMTV integration site family, member 5B     | <a href="#">81029</a>     | 2.594876721 | 3.99E-02 |
| DNAH3      | dynein, axonemal, heavy chain 3                           | <a href="#">55567</a>     | 0.568332373 | 4.00E-02 |
| SORT1      | sortilin 1                                                | <a href="#">6272</a>      | 1.662441184 | 4.01E-02 |
| PRDX2P1    | peroxiredoxin 2 pseudogene 1                              | <a href="#">359844</a>    | 1.502181775 | 4.06E-02 |
| STARD4-AS1 | STARD4 antisense RNA 1                                    | <a href="#">100505678</a> | 0.676129641 | 4.06E-02 |
| DOCK7      | dedicator of cytokinesis 7                                | <a href="#">85440</a>     | 1.520464887 | 4.08E-02 |
| DCHS2      | dachsous 2 (Drosophila)                                   | <a href="#">54798</a>     | 2.461500444 | 4.10E-02 |
| SNORA75    | small nucleolar RNA, H/ACA box 75                         | <a href="#">654321</a>    | 1.726481171 | 4.10E-02 |
| WDR81      | WD repeat domain 81                                       | <a href="#">124997</a>    | 0.491465823 | 4.10E-02 |
| ITGB5-AS1  | ITGB5 antisense RNA 1                                     | <a href="#">100873992</a> | 0.726323971 | 4.11E-02 |



## Supplementary Table 1

|            |                                                                                                     |                           |             |          |
|------------|-----------------------------------------------------------------------------------------------------|---------------------------|-------------|----------|
| C4orf19    | chromosome 4 open reading frame 19                                                                  | <a href="#">55286</a>     | 1.826182059 | 4.13E-02 |
| TRPC4      | transient receptor potential cation channel, subfamily C, member 4                                  | <a href="#">7223</a>      | 3.548272968 | 4.15E-02 |
| CEP57L1    | centrosomal protein 57kDa-like 1                                                                    | <a href="#">285753</a>    | 1.422861758 | 4.20E-02 |
| CSNK1E     | casein kinase 1, epsilon                                                                            | <a href="#">1454</a>      | 1.397661213 | 4.23E-02 |
| CCDC138    | coiled-coil domain containing 138                                                                   | <a href="#">165055</a>    | 1.825069748 | 4.24E-02 |
| HAUS6      | HAUS augmin-like complex, subunit 6                                                                 | <a href="#">54801</a>     | 1.671773503 | 4.25E-02 |
| TXN2       | thioredoxin 2                                                                                       | <a href="#">25828</a>     | 0.718939213 | 4.26E-02 |
| MMP8       | matrix metalloproteinase 8 (neutrophil collagenase)                                                 | <a href="#">4317</a>      | 4.78766099  | 4.26E-02 |
| COA3       | cytochrome C oxidase assembly factor 3                                                              | <a href="#">28958</a>     | 3.12861037  | 4.26E-02 |
| SPTAN1     | spectrin, alpha, non-erythrocytic 1                                                                 | <a href="#">6709</a>      | 0.696540237 | 4.26E-02 |
| CORO6      | coronin 6                                                                                           | <a href="#">84940</a>     | 0.56019418  | 4.26E-02 |
| NAMPTL     | nicotinamide phosphoribosyltransferase-like                                                         | <a href="#">646309</a>    | 1.507146543 | 4.27E-02 |
| CAMK2A     | calcium/calmodulin-dependent protein kinase II alpha                                                | <a href="#">815</a>       | 2.181183278 | 4.28E-02 |
| PODNL1     | podocan-like 1                                                                                      | <a href="#">79883</a>     | 1.734280552 | 4.28E-02 |
| SERPINH1   | serpin peptidase inhibitor, clade H (heat shock protein 47), member 1, (collagen binding protein 1) | <a href="#">871</a>       | 0.61617519  | 4.30E-02 |
| SH3BP5-AS1 | SH3BP5 antisense RNA 1                                                                              | <a href="#">100505696</a> | 0.649785475 | 4.31E-02 |
| VEGFB      | vascular endothelial growth factor B                                                                | <a href="#">7423</a>      | 1.503360288 | 4.34E-02 |
| CDK1       | cyclin-dependent kinase 1                                                                           | <a href="#">983</a>       | 1.745610639 | 4.41E-02 |
| RAVER1     | ribonucleoprotein, PTB-binding 1                                                                    | <a href="#">125950</a>    | 1.45261401  | 4.41E-02 |

## Supplementary Table 1

|           |                                                                                              |                           |             |          |
|-----------|----------------------------------------------------------------------------------------------|---------------------------|-------------|----------|
| DPF2      | D4, zinc and double PHD fingers family 2                                                     | <a href="#">5977</a>      | 0.712992497 | 4.41E-02 |
| HGF       | hepatocyte growth factor (hepapoietin A; scatter factor)                                     | <a href="#">3082</a>      | 0.251959368 | 4.41E-02 |
| ZNHIT3    | zinc finger, HIT-type containing 3                                                           | <a href="#">9326</a>      | 1.754978796 | 4.43E-02 |
| MROH2A    | maestro heat-like repeat family member 2A                                                    | <a href="#">339766</a>    | 1.952610373 | 4.44E-02 |
| KDM4A-AS1 | KDM4A antisense RNA 1                                                                        | <a href="#">100132774</a> | 0.729614851 | 4.45E-02 |
| MTERFD2   | MTERF domain containing 2                                                                    | <a href="#">130916</a>    | 0.367263136 | 4.48E-02 |
| VWA8      | von Willebrand factor A domain containing 8                                                  | <a href="#">23078</a>     | 2.183252512 | 4.51E-02 |
| PTMA      | prothymosin, alpha                                                                           | <a href="#">5757</a>      | 1.451946907 | 4.51E-02 |
| MMACHC    | methylmalonic aciduria (cobalamin deficiency) cbIC type, with homocystinuria                 | <a href="#">25974</a>     | 0.733575469 | 4.51E-02 |
| CILP      | cartilage intermediate layer protein, nucleotide pyrophosphohydrolase                        | <a href="#">8483</a>      | 0.311590899 | 4.51E-02 |
| RIF1      | RAP1 interacting factor homolog (yeast)                                                      | <a href="#">55183</a>     | 1.423531187 | 4.53E-02 |
| SMS       | spermine synthase                                                                            | <a href="#">6611</a>      | 1.624637218 | 4.53E-02 |
| CHN2      | chimerin (chimaerin) 2                                                                       | <a href="#">1124</a>      | 0.309279904 | 4.60E-02 |
| UBE2C     | ubiquitin-conjugating enzyme E2C                                                             | <a href="#">11065</a>     | 1.847270578 | 4.63E-02 |
| KDM4B     | lysine (K)-specific demethylase 4B                                                           | <a href="#">23030</a>     | 1.681460281 | 4.63E-02 |
| PGK1P2    | phosphoglycerate kinase 1, pseudogene 2                                                      | <a href="#">5233</a>      | 2.285942318 | 4.68E-02 |
| PTPN13    | protein tyrosine phosphatase, non-receptor type 13 (APO-1/CD95 (Fas)-associated phosphatase) | <a href="#">5783</a>      | 0.672199791 | 4.69E-02 |
| FBXO5     | F-box protein 5                                                                              | <a href="#">26271</a>     | 1.625155538 | 4.69E-02 |
| CASK-AS1  | CASK antisense RNA 1                                                                         | <a href="#">100873928</a> | 1.396405844 | 4.74E-02 |

## Supplementary Table 1

|          |                                                             |                        |             |          |
|----------|-------------------------------------------------------------|------------------------|-------------|----------|
| DNAJC22  | DnaJ (Hsp40) homolog, subfamily C, member 22                | <a href="#">79962</a>  | 4.114254389 | 4.75E-02 |
| ARPP19   | cAMP-regulated phosphoprotein, 19kDa                        | <a href="#">10776</a>  | 1.395816315 | 4.75E-02 |
| BCKDHB   | branched chain keto acid dehydrogenase E1, beta polypeptide | <a href="#">594</a>    | 0.647257373 | 4.75E-02 |
| BNC1     | basonuclin 1                                                | <a href="#">646</a>    | 1.619873552 | 4.76E-02 |
| SNRPN    | small nuclear ribonucleoprotein polypeptide N               | <a href="#">6638</a>   | 0.663935363 | 4.76E-02 |
| RHOD     | ras homolog family member D                                 | <a href="#">29984</a>  | 0.453233059 | 4.76E-02 |
| CDC42EP2 | CDC42 effector protein (Rho GTPase binding) 2               | <a href="#">10435</a>  | 0.572782055 | 4.79E-02 |
| SOGA1    | suppressor of glucose, autophagy associated 1               | <a href="#">140710</a> | 1.435662663 | 4.80E-02 |
| ADCY9    | adenylate cyclase 9                                         | <a href="#">115</a>    | 0.681951763 | 4.80E-02 |
| BARD1    | BRCA1 associated RING domain 1                              | <a href="#">580</a>    | 1.802217084 | 4.81E-02 |
| RALGPS2  | Ral GEF with PH domain and SH3 binding motif 2              | <a href="#">55103</a>  | 0.565929325 | 4.82E-02 |
| GTSE1    | G-2 and S-phase expressed 1                                 | <a href="#">51512</a>  | 1.70806846  | 4.83E-02 |
| MYO1B    | myosin IB                                                   | <a href="#">4430</a>   | 0.644854731 | 4.84E-02 |
| EXO1     | exonuclease 1                                               | <a href="#">9156</a>   | 1.906814895 | 4.90E-02 |
| ALDH1A1  | aldehyde dehydrogenase 1 family, member A1                  | <a href="#">216</a>    | 0.066772136 | 4.92E-02 |
| GTF2H5   | general transcription factor IIH, polypeptide 5             | <a href="#">404672</a> | 0.587626352 | 4.96E-02 |
| ZNRF3    | zinc and ring finger 3                                      | <a href="#">84133</a>  | 1.882232832 | 4.96E-02 |
| SLC26A6  | solute carrier family 26, member 6                          | <a href="#">65010</a>  | 1.719368881 | 4.96E-02 |
| ZNF738   | zinc finger protein 738                                     | <a href="#">148203</a> | 1.577746803 | 4.96E-02 |
| PROS1    | protein S (alpha)                                           | <a href="#">5627</a>   | 0.620140493 | 4.96E-02 |

## Supplementary Table 1

|       |                                                   |                       |             |          |
|-------|---------------------------------------------------|-----------------------|-------------|----------|
| AP4B1 | adaptor-related protein complex 4, beta 1 subunit | <a href="#">10717</a> | 1.678140025 | 4.98E-02 |
|-------|---------------------------------------------------|-----------------------|-------------|----------|

**Table S1.** List of differentially expressed genes between ADSC expanded under 21% and 1% oxygen. Gene symbols, gene names, EntrezGene ID and expression fold change (21%/1%) are given. Genes are listed in order of statistical significance based on q-values (Benjamini & Hochberg adjusted).

Supplementary Table 2

| KEGG Pathways                                    | Number of reference genes | Number of genes in the gene set | Expected number in the category | Ratio of enrichment | q-value (BH) |
|--------------------------------------------------|---------------------------|---------------------------------|---------------------------------|---------------------|--------------|
| Metabolic pathways                               | 1130                      | 65                              | 19.57                           | 3.32                | 6.22E-15     |
| Glutathione metabolism                           | 50                        | 13                              | 0.87                            | 15.01               | 1.53E-10     |
| Purine metabolism                                | 162                       | 15                              | 2.81                            | 5.35                | 7.81E-06     |
| Cell cycle                                       | 124                       | 13                              | 2.15                            | 6.05                | 9.18E-06     |
| Glycolysis / Gluconeogenesis                     | 65                        | 9                               | 1.13                            | 7.99                | 4.93E-05     |
| Pentose phosphate pathway                        | 27                        | 6                               | 0.47                            | 12.83               | 0.0001       |
| Metabolism of xenobiotics by cytochrome P450     | 71                        | 8                               | 1.23                            | 6.51                | 0.0006       |
| Drug metabolism - cytochrome P450                | 73                        | 8                               | 1.26                            | 6.33                | 0.0007       |
| Calcium signaling pathway                        | 177                       | 12                              | 3.07                            | 3.91                | 0.0009       |
| Pathways in cancer                               | 326                       | 17                              | 5.65                            | 3.01                | 0.0009       |
| p53 signaling pathway                            | 68                        | 7                               | 1.18                            | 5.94                | 0.0025       |
| Parkinson's disease                              | 130                       | 9                               | 2.25                            | 4.00                | 0.0057       |
| TGF-beta signaling pathway                       | 84                        | 7                               | 1.45                            | 4.81                | 0.0063       |
| Nicotinate and nicotinamide metabolism           | 24                        | 4                               | 0.42                            | 9.62                | 0.0069       |
| Glycosaminoglycan biosynthesis - heparan sulfate | 26                        | 4                               | 0.45                            | 8.88                | 0.0086       |
| Nucleotide excision repair                       | 44                        | 5                               | 0.76                            | 6.56                | 0.0086       |
| Complement and coagulation cascades              | 69                        | 6                               | 1.20                            | 5.02                | 0.0105       |
| Renal cell carcinoma                             | 70                        | 6                               | 1.21                            | 4.95                | 0.0107       |
| Pyrimidine metabolism                            | 99                        | 7                               | 1.71                            | 4.08                | 0.0123       |
| Glycosphingolipid biosynthesis - ganglio series  | 15                        | 3                               | 0.26                            | 11.55               | 0.0137       |
| Glycine, serine and threonine metabolism         | 32                        | 4                               | 0.55                            | 7.22                | 0.0144       |
| Cytokine-cytokine receptor interaction           | 265                       | 12                              | 4.59                            | 2.61                | 0.0156       |
| Focal adhesion                                   | 200                       | 10                              | 3.46                            | 2.89                | 0.0161       |
| Protein digestion and absorption                 | 81                        | 6                               | 1.40                            | 4.28                | 0.0166       |
| Oocyte meiosis                                   | 112                       | 7                               | 1.94                            | 3.61                | 0.0170       |
| Cysteine and methionine metabolism               | 36                        | 4                               | 0.62                            | 6.41                | 0.0170       |

Supplementary Table 2

|                                                        |     |    |      |       |        |
|--------------------------------------------------------|-----|----|------|-------|--------|
| ECM-receptor interaction                               | 85  | 6  | 1.47 | 4.08  | 0.0170 |
| DNA replication                                        | 36  | 4  | 0.62 | 6.41  | 0.0170 |
| One carbon pool by folate                              | 18  | 3  | 0.31 | 9.62  | 0.0170 |
| Vitamin B6 metabolism                                  | 6   | 2  | 0.10 | 19.24 | 0.0196 |
| Bladder cancer                                         | 42  | 4  | 0.73 | 5.50  | 0.0261 |
| Osteoclast differentiation                             | 128 | 7  | 2.22 | 3.16  | 0.0286 |
| Mismatch repair                                        | 23  | 3  | 0.40 | 7.53  | 0.0286 |
| Nitrogen metabolism                                    | 23  | 3  | 0.40 | 7.53  | 0.0286 |
| MAPK signaling pathway                                 | 268 | 11 | 4.64 | 2.37  | 0.0294 |
| Oxidative phosphorylation                              | 132 | 7  | 2.29 | 3.06  | 0.0316 |
| Cell adhesion molecules (CAMs)                         | 133 | 7  | 2.30 | 3.04  | 0.0322 |
| Arrhythmogenic right ventricular cardiomyopathy (ARVC) | 74  | 5  | 1.28 | 3.90  | 0.0334 |
| Amino sugar and nucleotide sugar metabolism            | 48  | 4  | 0.83 | 4.81  | 0.0334 |
| Homologous recombination                               | 28  | 3  | 0.48 | 6.19  | 0.0411 |
| Fc epsilon RI signaling pathway                        | 79  | 5  | 1.37 | 3.65  | 0.0411 |
| Histidine metabolism                                   | 29  | 3  | 0.50 | 5.97  | 0.0440 |
| Arginine and proline metabolism                        | 54  | 4  | 0.94 | 4.28  | 0.0445 |
| Starch and sucrose metabolism                          | 54  | 4  | 0.94 | 4.28  | 0.0445 |
| Hypertrophic cardiomyopathy (HCM)                      | 83  | 5  | 1.44 | 3.48  | 0.0451 |
| Hedgehog signaling pathway                             | 56  | 4  | 0.97 | 4.12  | 0.0469 |
| Wnt signaling pathway                                  | 150 | 7  | 2.60 | 2.69  | 0.0469 |
| Progesterone-mediated oocyte maturation                | 86  | 5  | 1.49 | 3.36  | 0.0485 |
| Arachidonic acid metabolism                            | 59  | 4  | 1.02 | 3.91  | 0.0496 |
| Base excision repair                                   | 33  | 3  | 0.57 | 5.25  | 0.0496 |
| Jak-STAT signaling pathway                             | 155 | 7  | 2.68 | 2.61  | 0.0496 |
| Lysosome                                               | 121 | 6  | 2.10 | 2.86  | 0.0496 |
| Apoptosis                                              | 87  | 5  | 1.51 | 3.32  | 0.0496 |

**Table S2.** Complete list of enriched pathways from differentially expressed genes between ADSC cultured under 21% or 1% oxygen. Gene symbols, the number of reference genes in the KEGG category, the number of genes in the genes set of differentially expressed gene list, the expected number in the category and the ratio of enrichment are given. Pathways are listed in order of statistical significance based on q-values (Benjamini & Hochberg adjusted).
